# Supplementary material for: Long-read sequencing reveals intra-species tolerance of substantial structural variations and new subtelomere formation in C. elegans
Source: PubMed Central journal article supplement — Genome Res. 2019 Jun;29(6):1023–35. doi: 10.1101/gr.246082.118 (PMC6581047; doi:10.1101/gr.246082.118), 2019-06
Supplement: supp_gr.246082.118_Supplemental_Fig_S1.pdf [file supp_gr.246082.118_Supplemental_Fig_S1.pdf]

**A**

|                          | Sub-read      | Sub-read (> 20 kb) |
|--------------------------|---------------|--------------------|
| Number of reads          | 968,475       | 32,180             |
| Number of bases (bp)     | 8,289,680,042 | 764,689,469        |
| Coverage                 | 79.71         | 7.35               |
| Maximum read length (bp) | 51,996        |                    |
| N50 (bp)                 | 11,828        |                    |

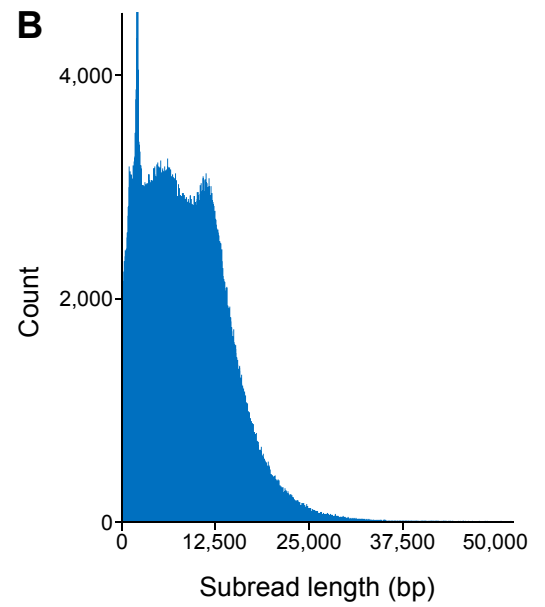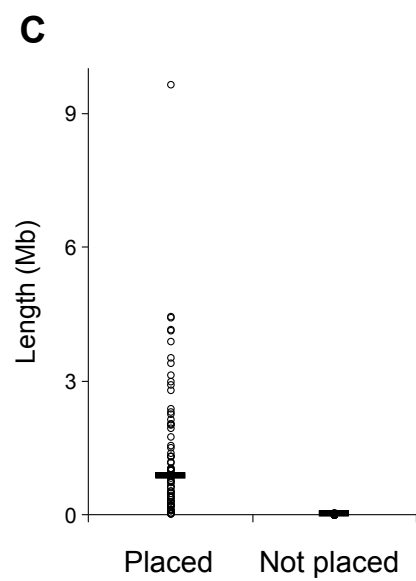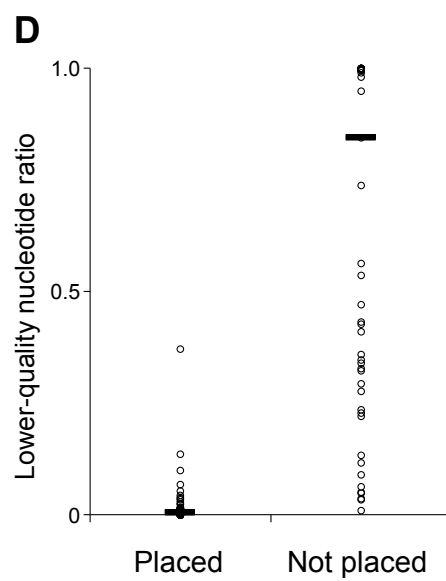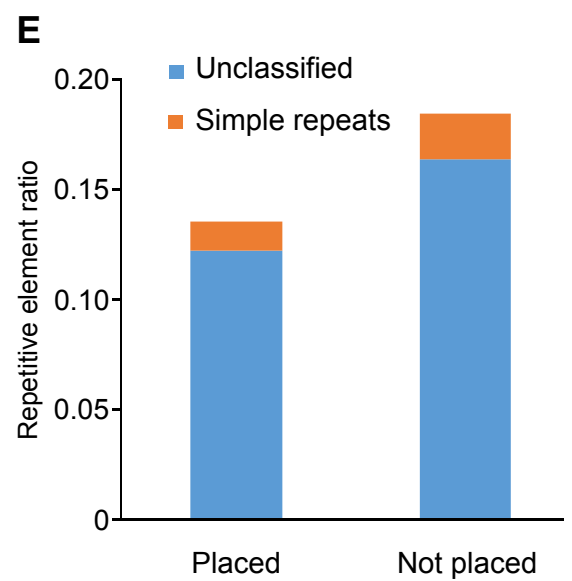

**Supplemental Figure S1.** Stats of PacBio raw reads and not placed contigs. (A) PacBio raw sub-reads statistics. (B) PacBio raw reads length distribution. (C) length, (D) lower-quality nucleotides ratio, and (E) repetitive element types of placed and not placed contigs on the N2 genome. Black horizontal bars represent median values.
