# Supplementary material for: Long-read sequencing reveals intra-species tolerance of substantial structural variations and new subtelomere formation in C. elegans
Source: PubMed Central journal article supplement — Genome Res. 2019 Jun;29(6):1023–35. doi: 10.1101/gr.246082.118 (PMC6581047; doi:10.1101/gr.246082.118), 2019-06
Supplement: supp_gr.246082.118_Supplemental_Fig_S2.pdf [file supp_gr.246082.118_Supplemental_Fig_S2.pdf]

**A**

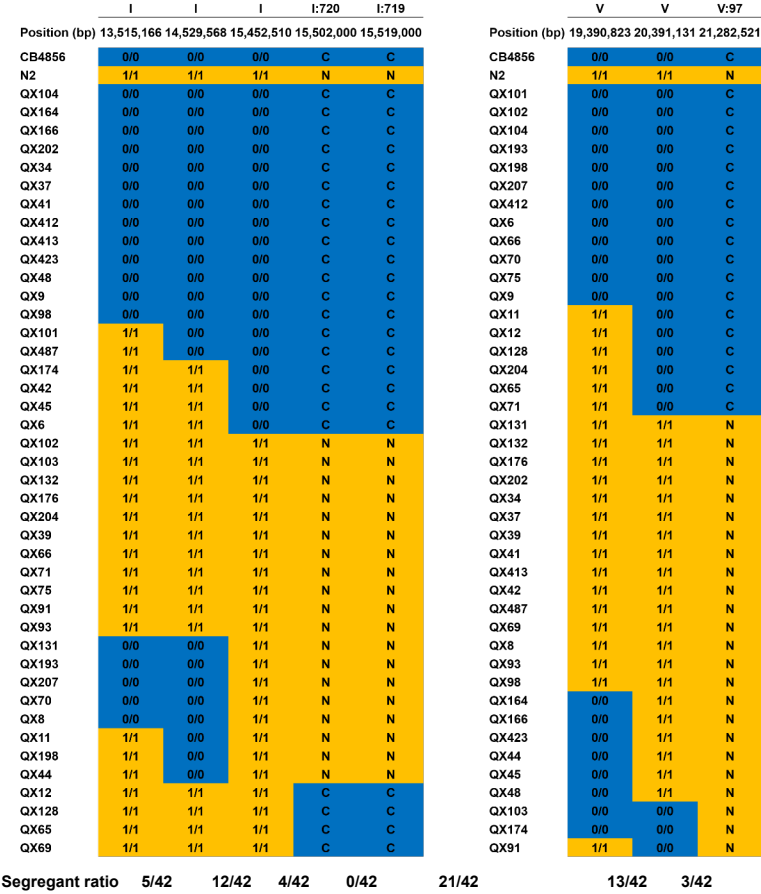

**B**

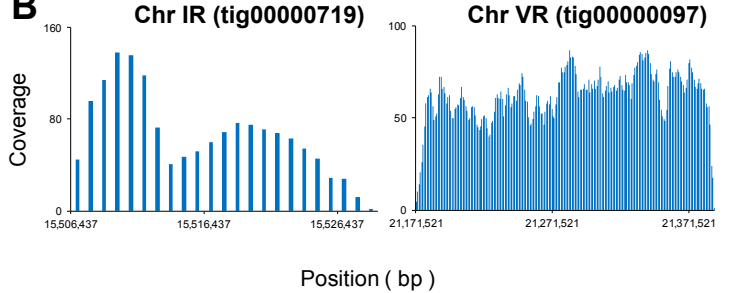

**C**

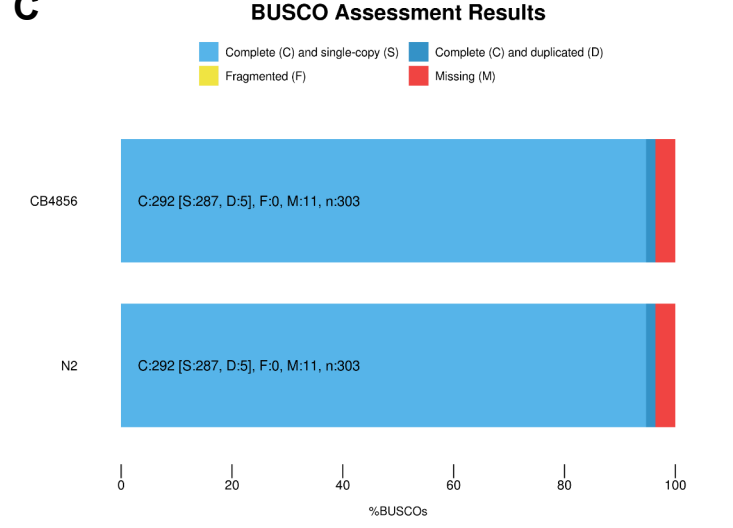

**D**

|      | Contig name | Contig size (bp) | Start of telomeric array | End of telomeric array | Telomeric repeat sequence | Telomere length (bp) | Position of telomere on contig | Number of canonical telomeric repeats |
|------|-------------|------------------|--------------------------|------------------------|---------------------------|----------------------|--------------------------------|---------------------------------------|
| IL   | tig00000193 | 1,021,041        | 1,018,151                | 1,021,041              | TTAGGC                    | 2,886                | End                            | 481                                   |
| IR   | tig00000719 | 22,460           | 1                        | 3,348                  | GCCTAA                    | 3,348                | Start                          | 508                                   |
| IIL  | tig00000150 | 1,498,322        | 1                        | 3,979                  | GCCTAA                    | 3,979                | Start                          | 587                                   |
| IIR  | tig00000156 | 1,307,113        | 1,303,937                | 1,307,113              | TTAGGC                    | 3,177                | End                            | 473                                   |
| IIIL | tig00000201 | 999,175          | 1                        | 3,121                  | GCCTAA                    | 3,121                | Start                          | 480                                   |
| IIIR | tig00000291 | 205,719          | 1                        | 2,524                  | GCCTAA                    | 2,524                | Start                          | 390                                   |
| IVL  | tig00000324 | 22,756           | 19,410                   | 22,755                 | TTAGGC                    | 3,347                | End                            | 532                                   |
| IVR  | tig00000212 | 451,830          | 1                        | 2,772                  | GCCTAA                    | 2,772                | Start                          | 399                                   |
| VL   | tig00000764 | 282,952          | 280,057                  | 282,952                | TTAGGC                    | 2,896                | End                            | 401                                   |
| VR   | tig00000097 | 218,346          | 216,009                  | 218,346                | TTAGGC                    | 2,338                | End                            | 344                                   |
| XL   | tig00000307 | 97,378           | 1                        | 3,259                  | GCCTAA                    | 3,259                | Start                          | 516                                   |
| XR   | tig00000073 | 2,855,796        | 2,853,115                | 2,855,796              | TTAGGC                    | 2,682                | End                            | 386                                   |

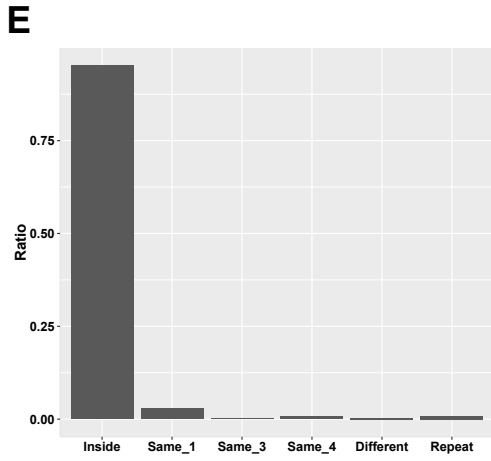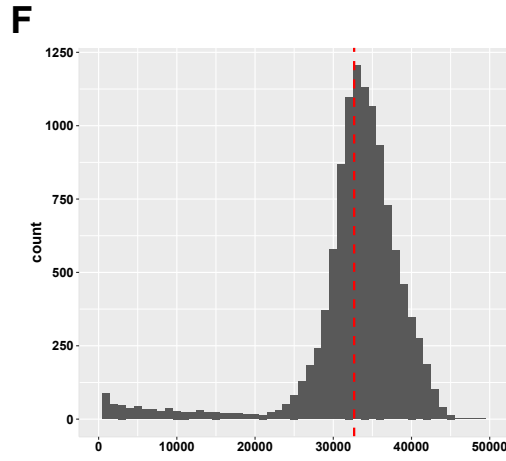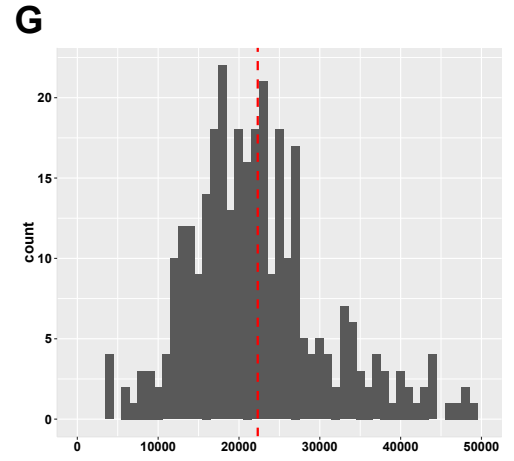

**Supplemental Figure S2.** Linkage map and genome quality. (A) Linkage map of Chr IR and Chr VR ends. Blue: CB4856 alleles; yellow: N2 alleles. 0/0: homozygous for CB4856 alleles; 1/1 homozygous for N2 alleles as a result of variant calling with GATK. C, homozygous for CB4856; or N, homozygous for N2 alleles, based on whether each strain contains CB4856-specific sequences (N2 has zero coverage in this region). Segregant ratio represents the number of strains that have different allele types between positions. For example, 21/42 in the middle of the graph indicates that 21 strains have N2 and CB4856 allele types (or vice versa) in Chr I and Chr V, respectively, but not N2 and N2 or CB4856 and CB4856 alleles. tig00000719 and tig00000097 were not placed on the N2 genome, but they are highly linked with chrIR and chrVR ends, respectively. (B) Coverage plot of both contigs. (C) BUSCO assessment of CB4856 and N2 genomes. (D) Telomere lengths and telomere-containing contigs. (E) Fosmid alignment to the Kim et al., 2019 genome. Inside, fosmids aligned within a single contig ; Same\_1, fosmid aligned to two adjacent contigs; Same\_3, the distance between two ends of the fosmid was longer than 3 contigs; Same\_4, longer than 4 contigs; different, one fosmid aligned to two different contigs; repeat, fosmid sequence from repeat sequences. (F) length distribution of ‘inside’ fosmids, which are contained within a single contig. (G) length distribution of fosmids that are aligned to two adjacent contigs.
