# Supplementary material for: Long-read sequencing reveals intra-species tolerance of substantial structural variations and new subtelomere formation in C. elegans
Source: PubMed Central journal article supplement — Genome Res. 2019 Jun;29(6):1023–35. doi: 10.1101/gr.246082.118 (PMC6581047; doi:10.1101/gr.246082.118), 2019-06
Supplement: supp_gr.246082.118_Supplemental_Fig_S3.pdf [file supp_gr.246082.118_Supplemental_Fig_S3.pdf]

**A**

|       | Thompson genome | Kim genome |
|-------|-----------------|------------|
| SNP   | 19827           | 987        |
| Indel | 8336            | 352        |

**B**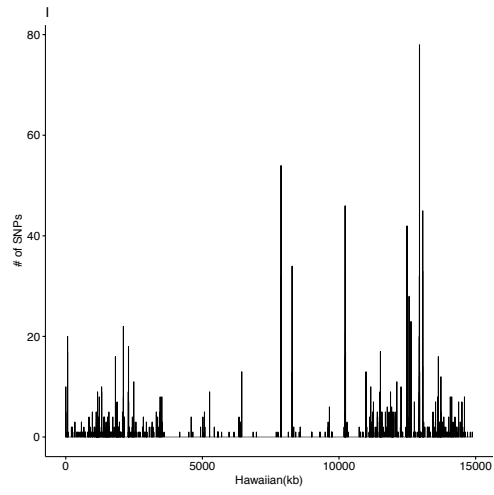**C**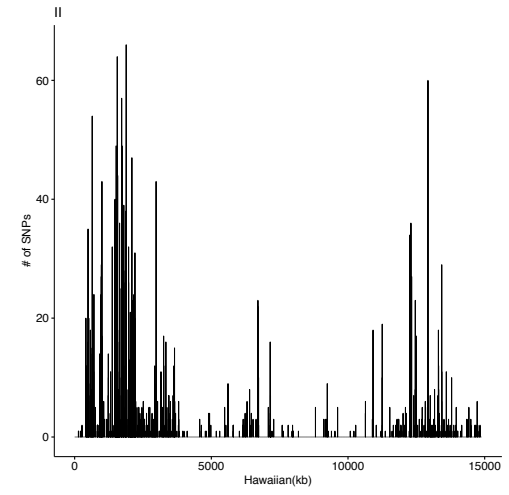**D**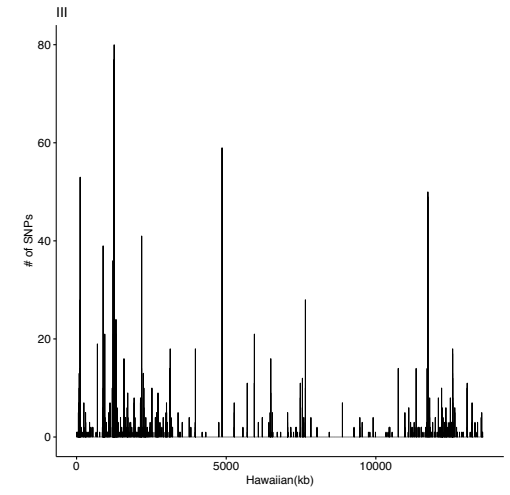**E**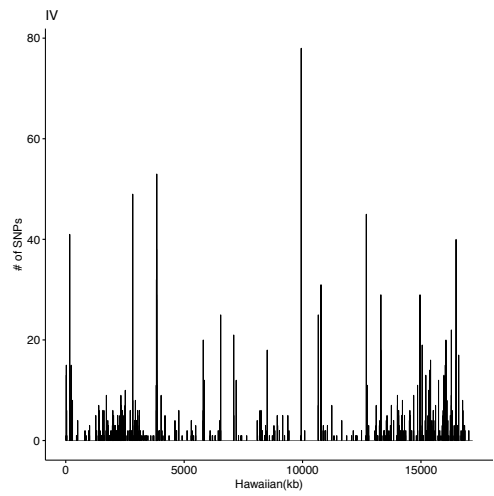**F**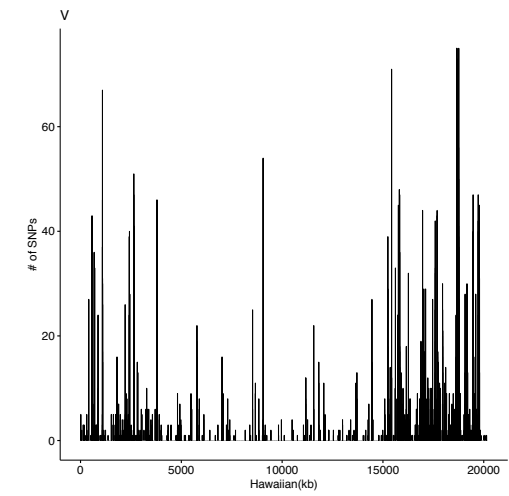**G**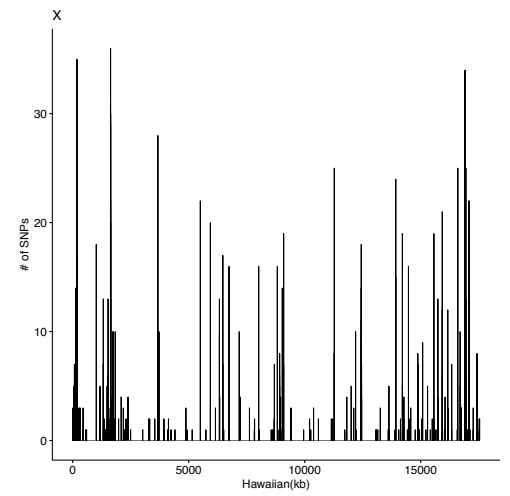

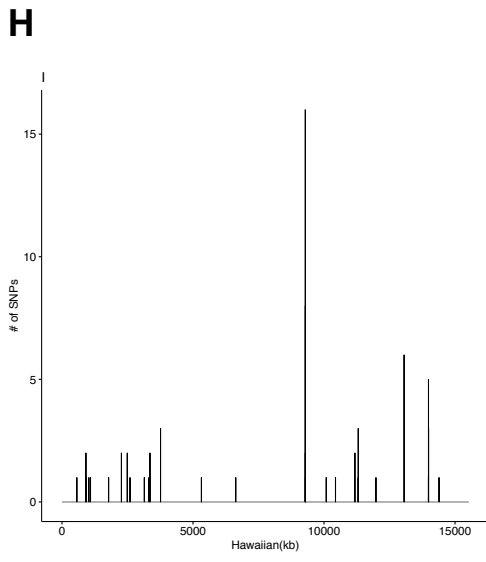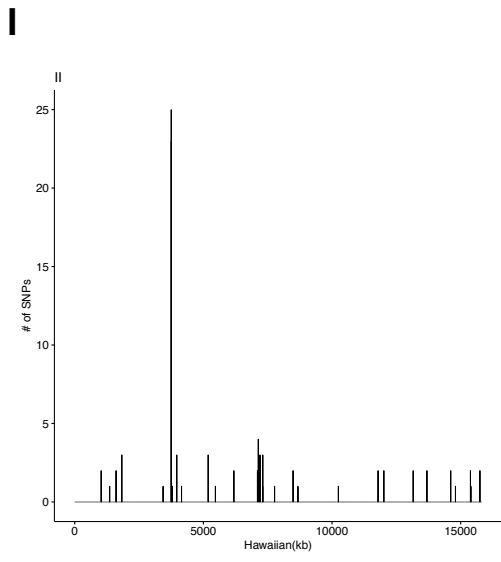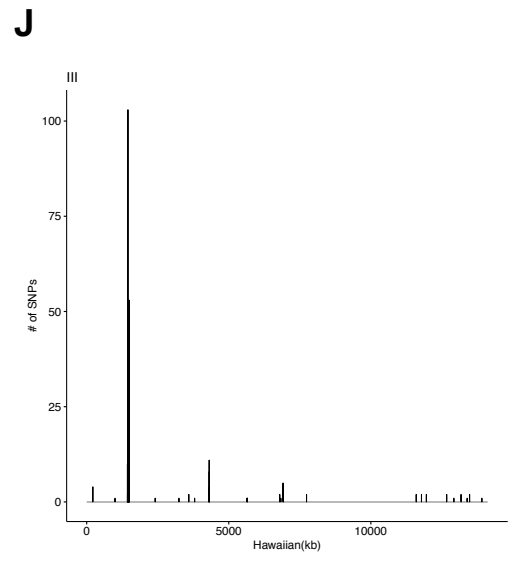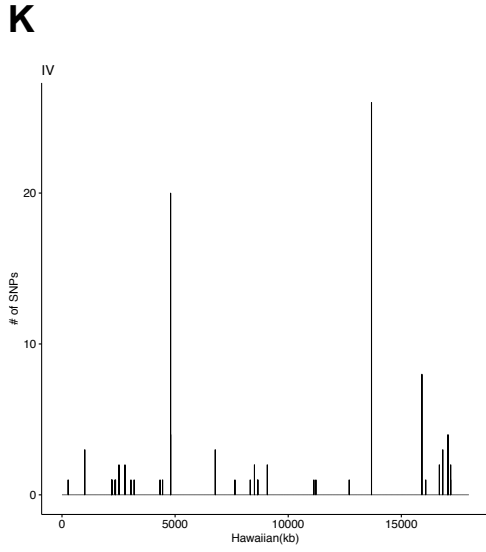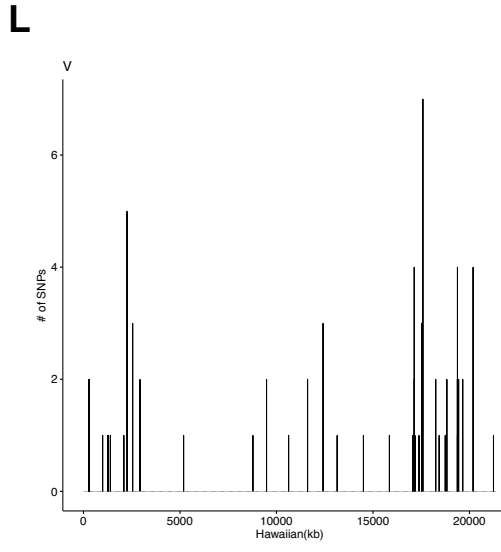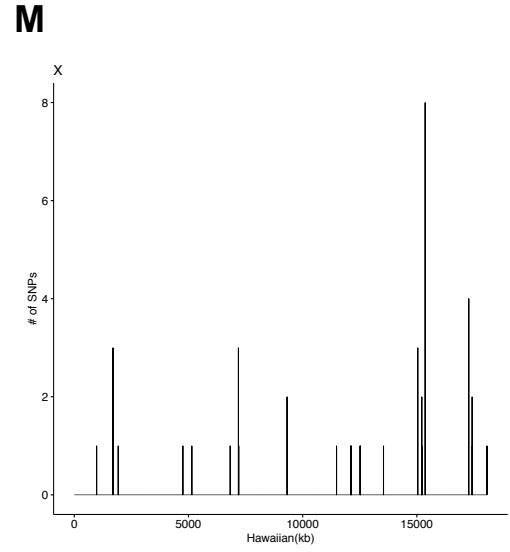

**Supplemental Figure S3.** Variant call by CB4856 HiSeq short read at both genomes. (A) Number of SNP and Indel in both genomes. (B-M) The chromosomal distributions of short read sequencing align against the Thompson genome (B-G), or the Kim genome (H-M).
