# Supplementary material for: Long-read sequencing reveals intra-species tolerance of substantial structural variations and new subtelomere formation in C. elegans
Source: PubMed Central journal article supplement — Genome Res. 2019 Jun;29(6):1023–35. doi: 10.1101/gr.246082.118 (PMC6581047; doi:10.1101/gr.246082.118), 2019-06
Supplement: supp_gr.246082.118_Supplemental_Fig_S4.pdf [file supp_gr.246082.118_Supplemental_Fig_S4.pdf]

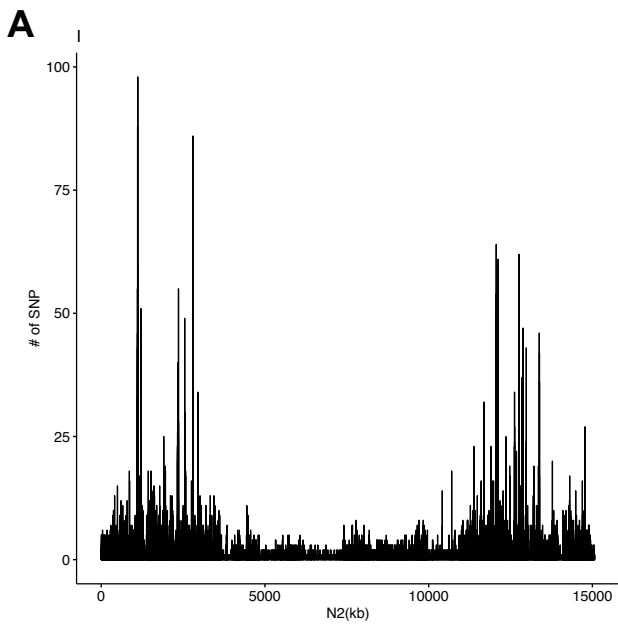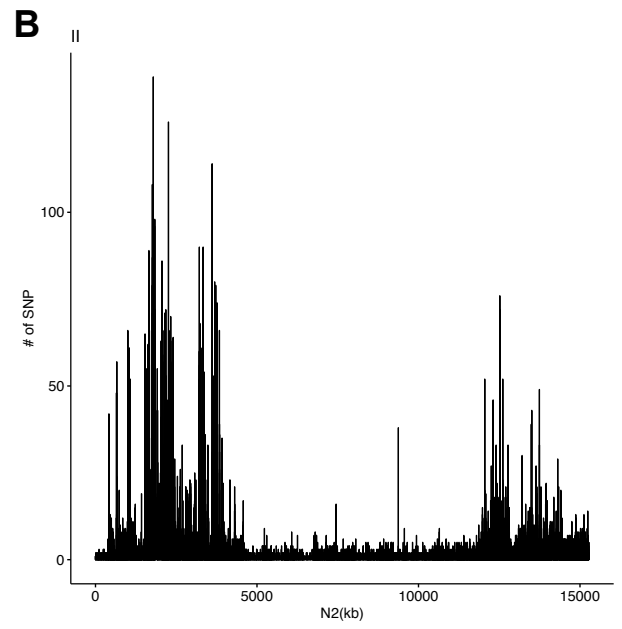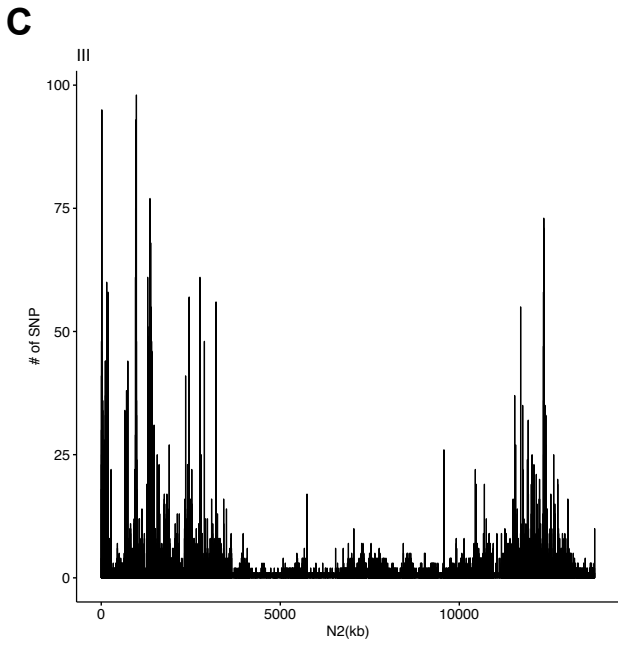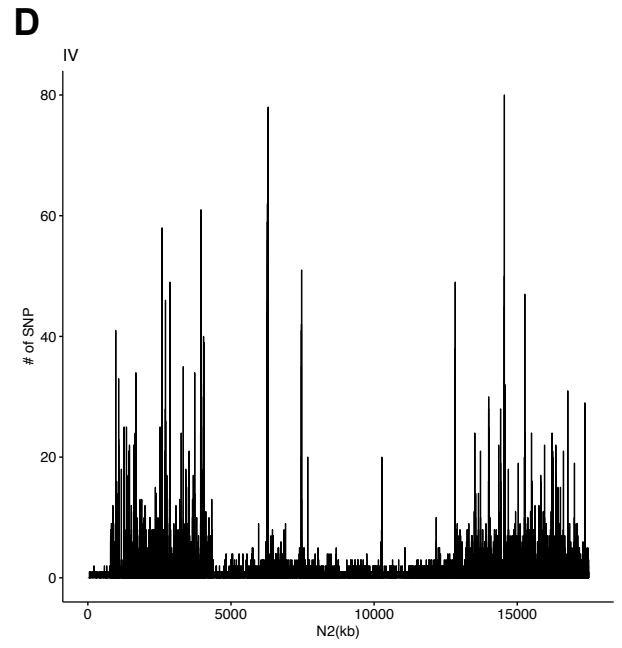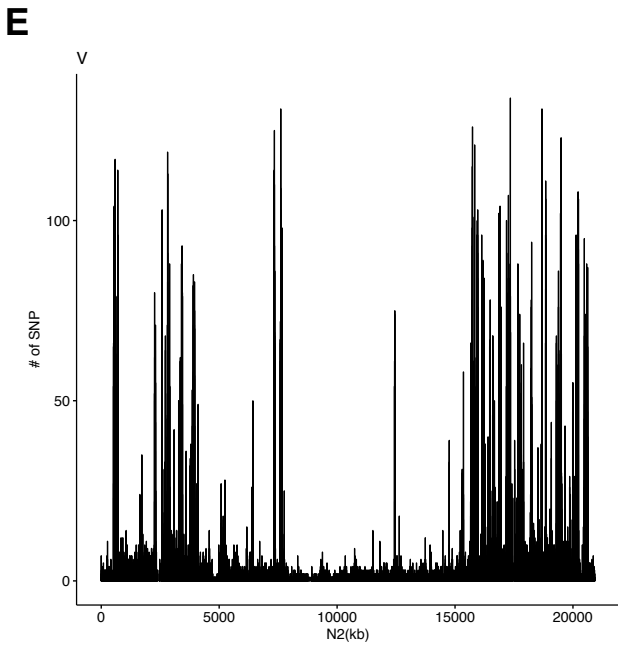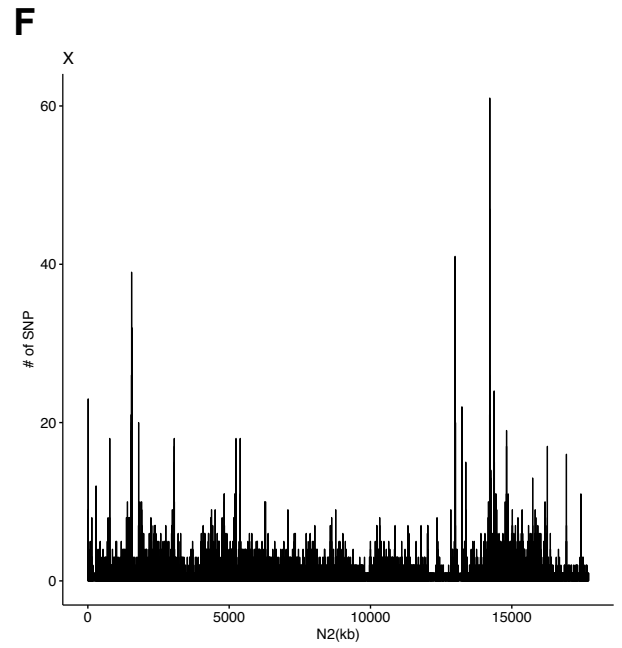

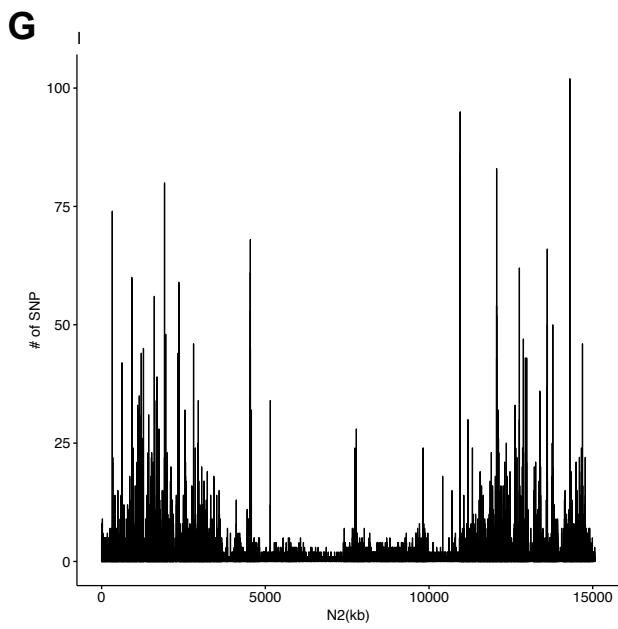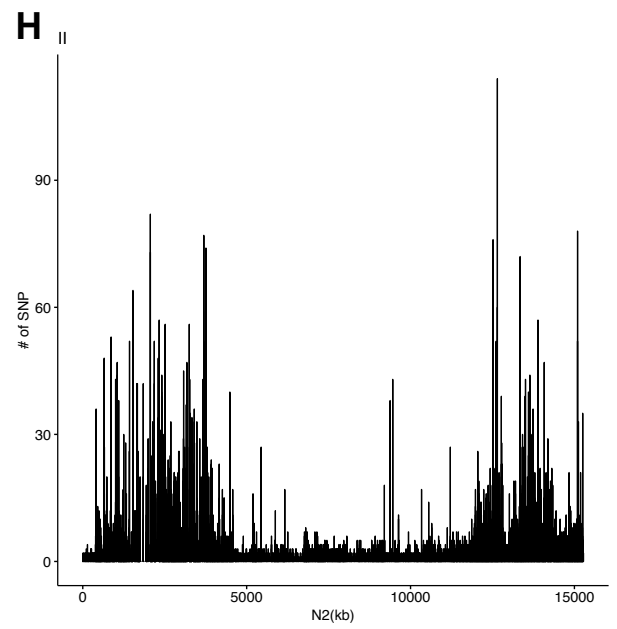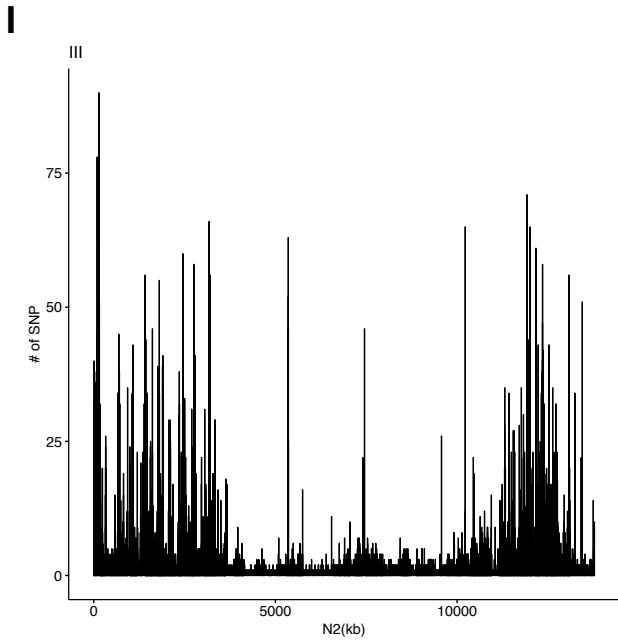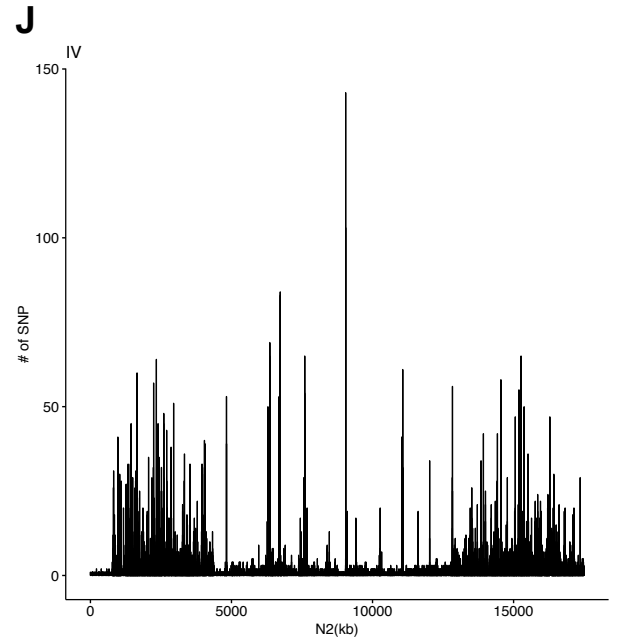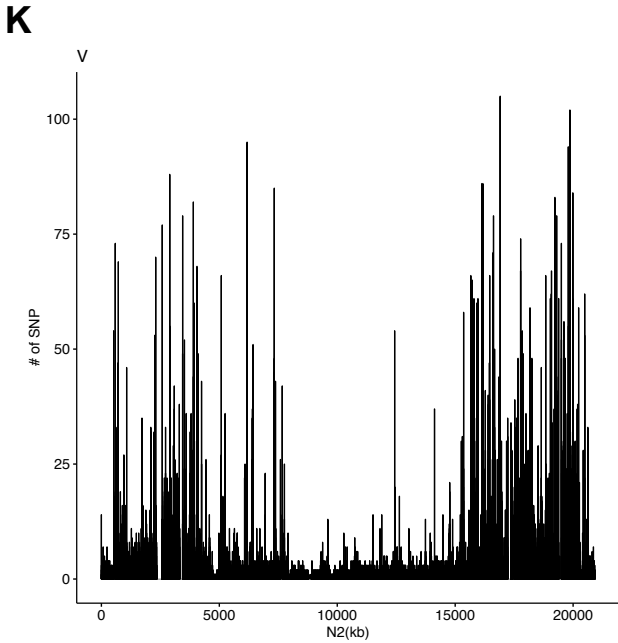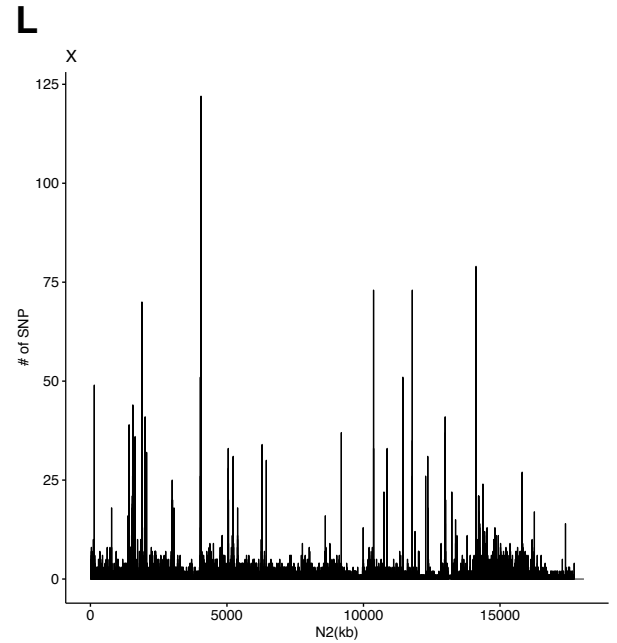

**Supplemental Figure S4.** Density of SNP variant sites across chromosomes. Density was calculated in 9 kb windows moving in 1 kb steps. Density of SNP at the Thompson genome (*A-F*), Density of SNP at the Kim genome (*G-L*).
