# Supplementary material for: Long-read sequencing reveals intra-species tolerance of substantial structural variations and new subtelomere formation in C. elegans
Source: PubMed Central journal article supplement — Genome Res. 2019 Jun;29(6):1023–35. doi: 10.1101/gr.246082.118 (PMC6581047; doi:10.1101/gr.246082.118), 2019-06
Supplement: supp_gr.246082.118_Supplemental_Fig_S5.pdf [file supp_gr.246082.118_Supplemental_Fig_S5.pdf]

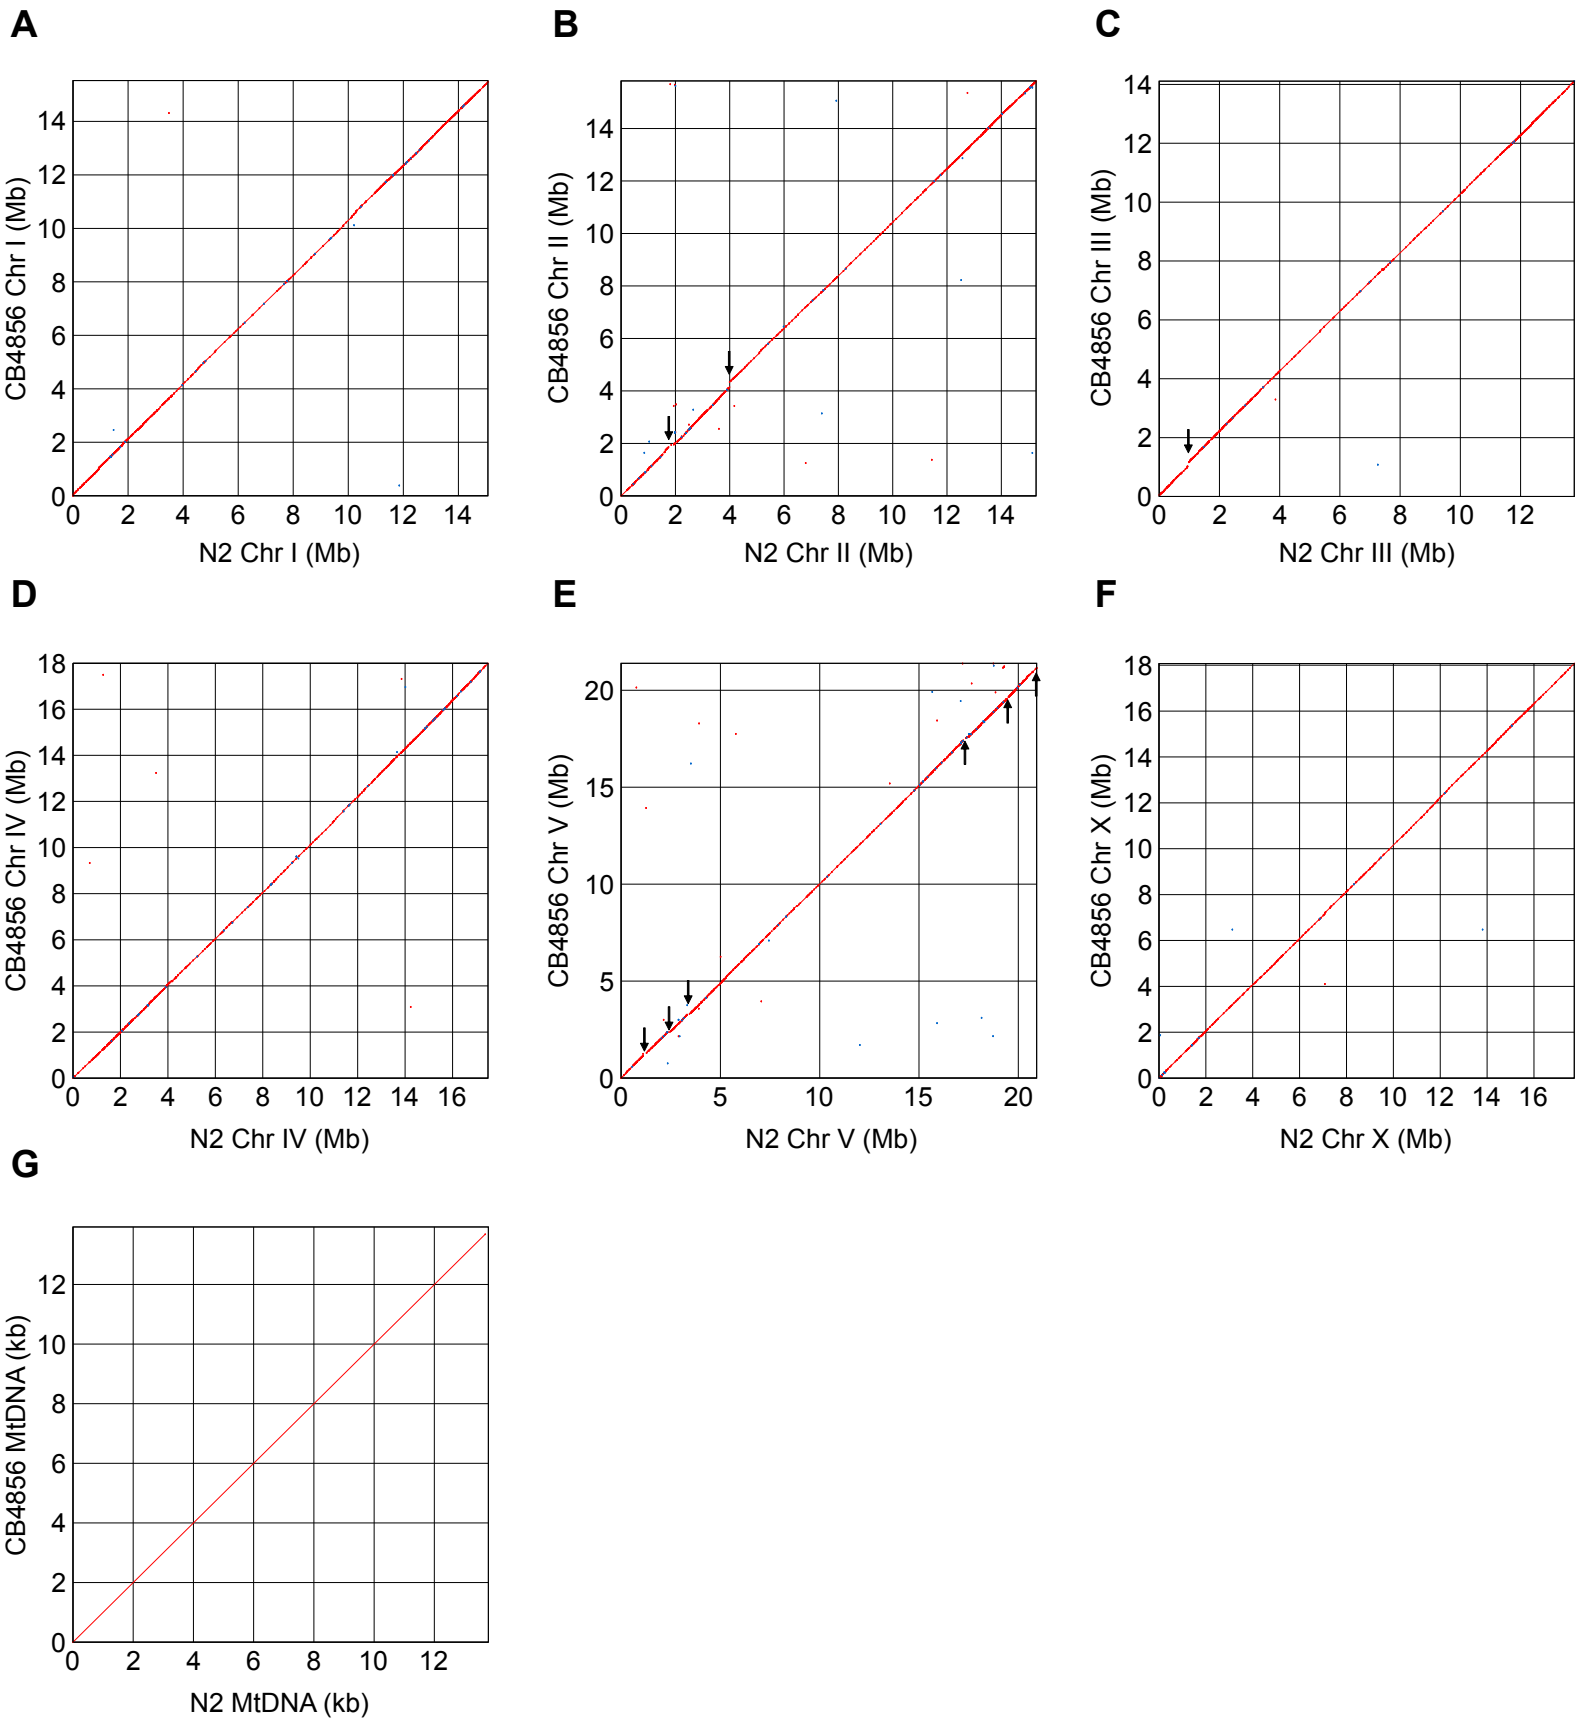

**Supplemental Figure S5.** Alignment and structural variations between N2 and CB4856 chromosomes. (A-G) Dot plots showing alignment between Chr Is (A), Chr IIs (B), Chr IIIs (C), Chr IVs (D), Chr Vs (E), Chr Xs (F), and mitochondrial genomes (G) of N2 and CB4856 strains. Red: forward strand matches; Blue: reverse strand matches; Arrows: extreme break points.
