# Supplementary material for: Long-read sequencing reveals intra-species tolerance of substantial structural variations and new subtelomere formation in C. elegans
Source: PubMed Central journal article supplement — Genome Res. 2019 Jun;29(6):1023–35. doi: 10.1101/gr.246082.118 (PMC6581047; doi:10.1101/gr.246082.118), 2019-06
Supplement: supp_gr.246082.118_Supplemental_Fig_S6.pdf [file supp_gr.246082.118_Supplemental_Fig_S6.pdf]

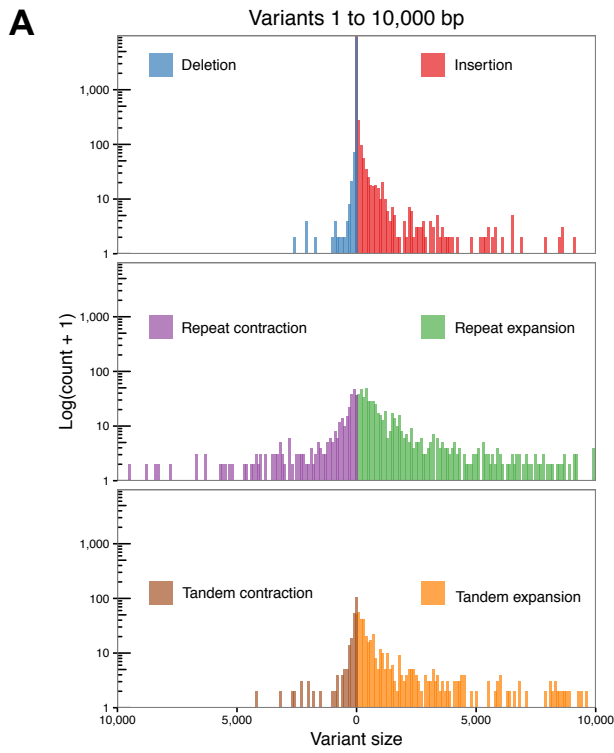

**B**

| Variant type                           | Total base pairs |
|----------------------------------------|------------------|
| Insertion (Ins)                        | 508,763          |
| Deletion (Del)                         | 58,165           |
| <b>Ins-Del</b>                         | <b>450,598</b>   |
| Tandem_expansion (Texp)                | 557,898          |
| Tandem_contraction (Tcont)             | 47,733           |
| <b>Texp-Tcont</b>                      | <b>510,165</b>   |
| Repeat_expansion (Rexp)                | 999,426          |
| Repeat_contraction (Rcont)             | 319,997          |
| <b>Rexp-Rcont</b>                      | <b>679,429</b>   |
| Unaligned base (Kim et al., 2019)      | <b>4,019,041</b> |
| Unaligned base (Thompson et al., 2015) | <b>607,896</b>   |
| <b>Total change</b>                    | <b>5,051,337</b> |

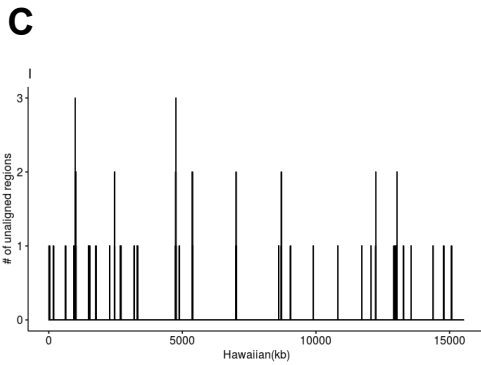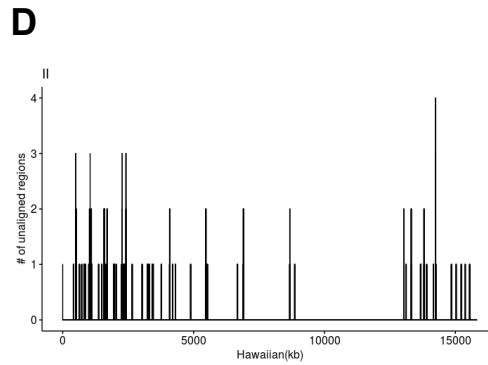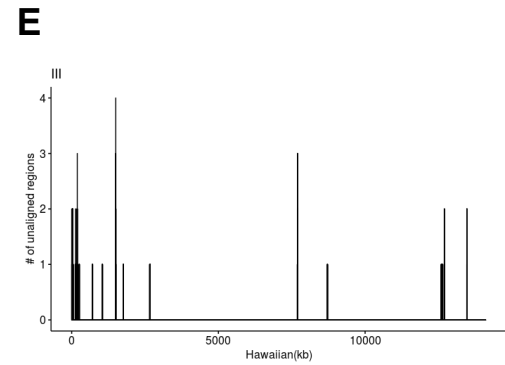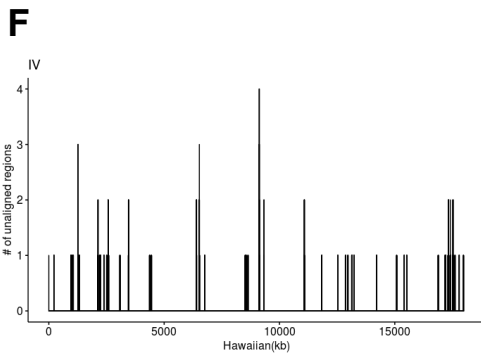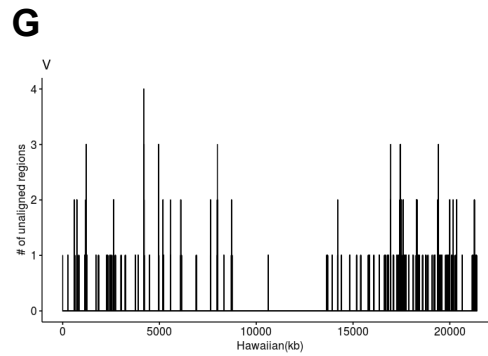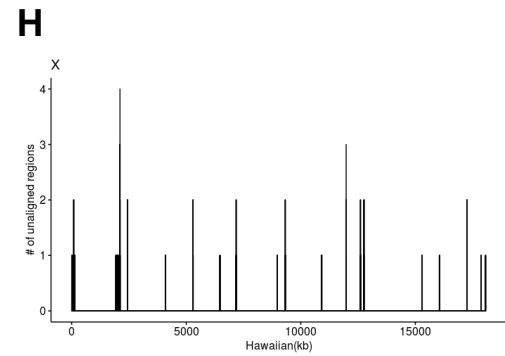

**I**

| Method | Subset     | Subset   | Intersection | Intersection |
|--------|------------|----------|--------------|--------------|
| Offset | `+/- 0.5kb | `+/- 1kb | `+/- 0.5kb   | `+/- 1kb     |
| I      | 82.38%     | 84.63%   | 89.55%       | 90.16%       |
| II     | 85.19%     | 87.59%   | 92.22%       | 92.41%       |
| III    | 81.36%     | 85.04%   | 89.50%       | 90.81%       |
| IV     | 82.55%     | 85.10%   | 90.59%       | 90.78%       |
| V      | 85.77%     | 87.85%   | 91.16%       | 91.71%       |

**Supplemental Figure S6.** Direct comparison of the Kim genome and the Thompson genome. (A) SVs in the Kim genome with the Thompson genome as a reference. (B) Length of SVs in the Kim genome. (C-H) Distribution of unaligned bases. (I) Comparing SVs found in the Thompson genome and the Kim genome. ‘Subset’ case means an SV from one genome are completely included within an SV of the other genome, and the ‘intersection’ case means that the two SVs partially overlap each other.
