# Supplementary material for: Long-read sequencing reveals intra-species tolerance of substantial structural variations and new subtelomere formation in C. elegans
Source: PubMed Central journal article supplement — Genome Res. 2019 Jun;29(6):1023–35. doi: 10.1101/gr.246082.118 (PMC6581047; doi:10.1101/gr.246082.118), 2019-06
Supplement: supp_gr.246082.118_Supplemental_Fig_S7.pdf [file supp_gr.246082.118_Supplemental_Fig_S7.pdf]

**A**

|                                            | N2    | CB4856           |
|--------------------------------------------|-------|------------------|
| Genes                                      | 46742 | 46238<br>(98.9%) |
| Protein coding genes                       | 20039 | 19355<br>(96.6%) |
| Transferred protein coding genes           |       | 19355            |
| Not transferred protein coding genes       | 684   |                  |
| N2 specific genes                          | 619   |                  |
| Partially transferred protein coding genes | 345   |                  |
| Gene prediction                            |       | 781              |

**B**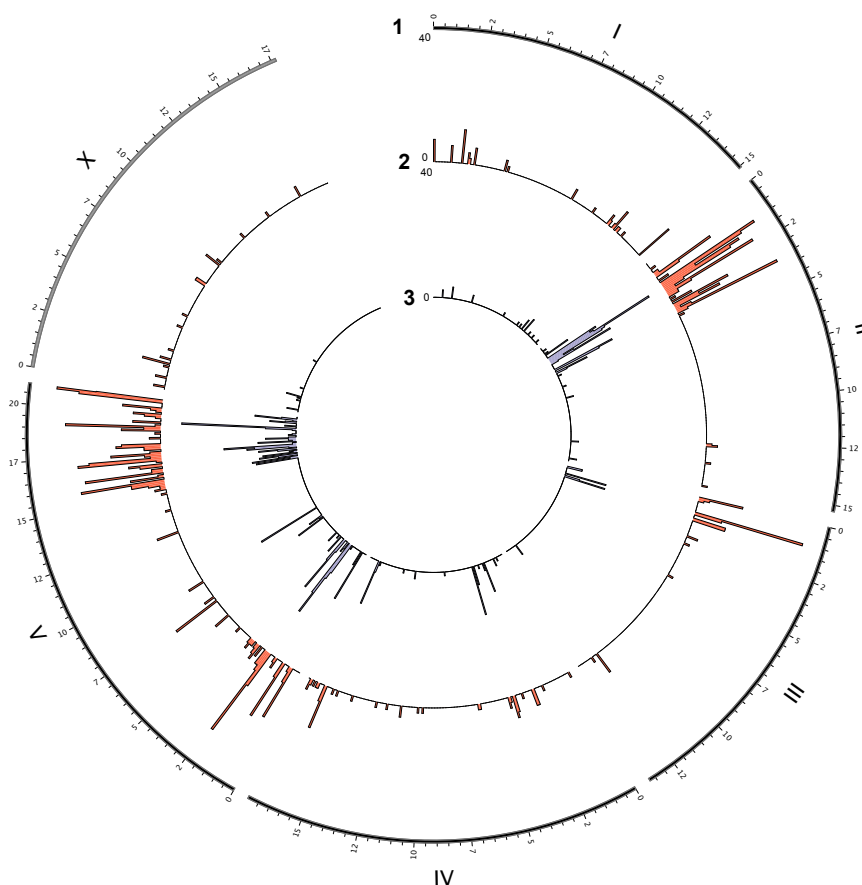

**Supplemental Figure S7.** CB4856 gene annotation. (A) Annotation report of CB4856. Transferred protein coding genes: number of transferred genes from N2 by RATT; not transferred protein coding genes: number of not-transferred genes from N2 by RATT; N2-specific genes: number of genes that were confirmed to be absent in the Kim genome by blast; partially transferred protein coding genes: number of genes whose exons are partially deleted; gene prediction: number of de novo annotated genes by Maker in the ‘not transferred region’ by RATT. (B) Tracks representing density at 100 kb intervals; from outside to inside: 1, genomic positions (in Mb) of the six chromosomes based on the N2 genome; 2, density of CB4856-specific genes; 3, density of N2-specific genes.
