# Supplementary material for: Long-read sequencing reveals intra-species tolerance of substantial structural variations and new subtelomere formation in C. elegans
Source: PubMed Central journal article supplement — Genome Res. 2019 Jun;29(6):1023–35. doi: 10.1101/gr.246082.118 (PMC6581047; doi:10.1101/gr.246082.118), 2019-06
Supplement: supp_gr.246082.118_Supplemental_Fig_S8.pdf [file supp_gr.246082.118_Supplemental_Fig_S8.pdf]

**A**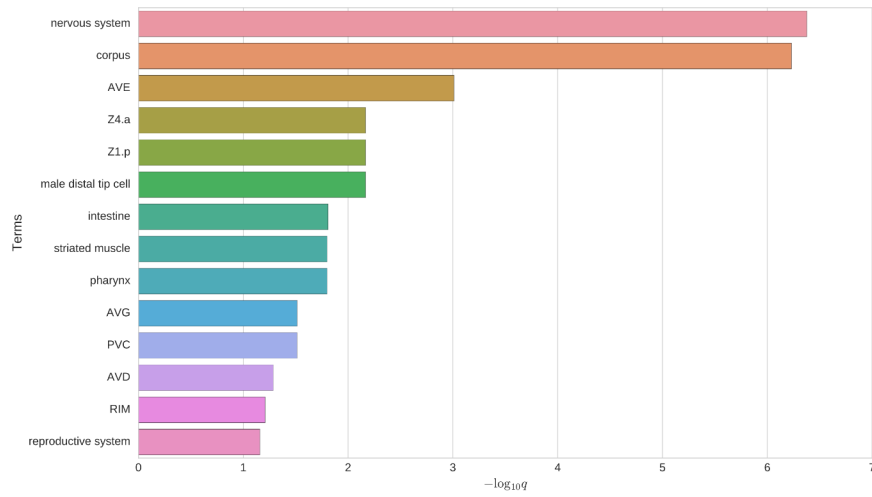**B**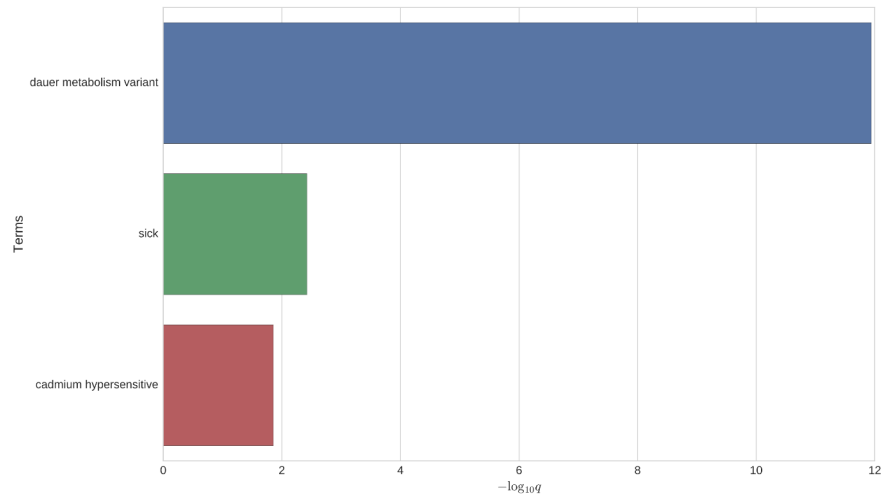**C**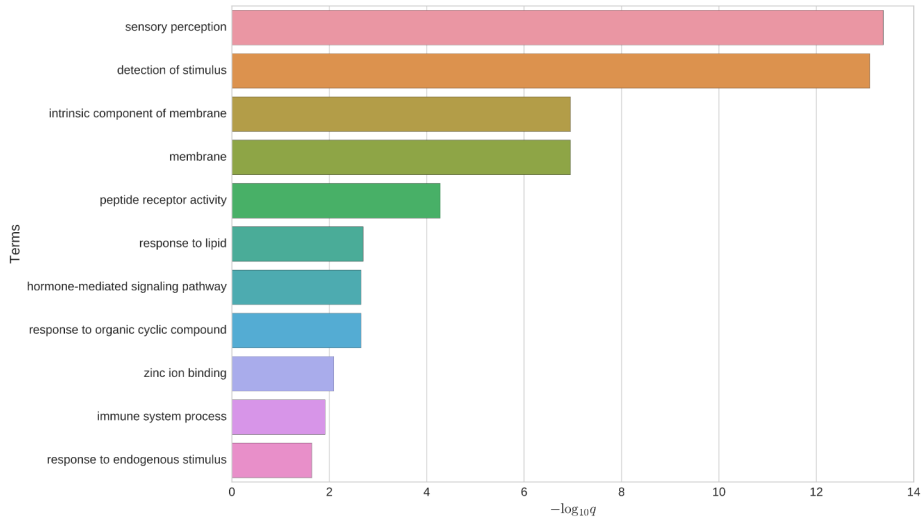

**Supplemental Figure S8.** N2 Genes affected by SVs at CB4856. (A) Tissue Enrichment Analysis of high-impact SV genes. (B) Phenotype Enrichment Analysis of high-impact SV genes. (C) Gene Ontology Enrichment Analysis of high-impact SV genes.
