# Supplementary material for: Long-read sequencing reveals intra-species tolerance of substantial structural variations and new subtelomere formation in C. elegans
Source: PubMed Central journal article supplement — Genome Res. 2019 Jun;29(6):1023–35. doi: 10.1101/gr.246082.118 (PMC6581047; doi:10.1101/gr.246082.118), 2019-06
Supplement: supp_gr.246082.118_Supplemental_Fig_S9.pdf [file supp_gr.246082.118_Supplemental_Fig_S9.pdf]

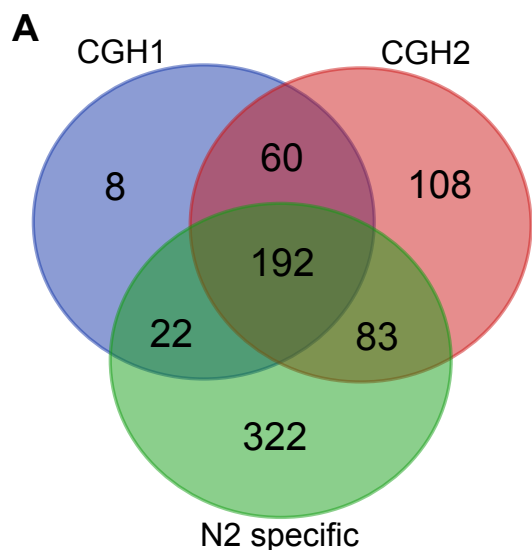

**B**

|                  | CGH1-specific | CGH2-specific | Intersection (CGH1 & CGH2) |
|------------------|---------------|---------------|----------------------------|
| High impact gene | 5             | 64            | 49                         |
| Pseudogene       | 1             | 26            | 9                          |
| No_clue          | 2             | 18            | 2                          |
| Total            | 8             | 108           | 60                         |

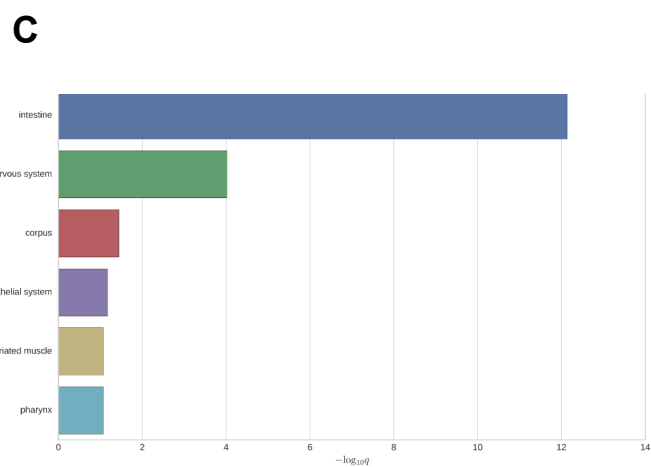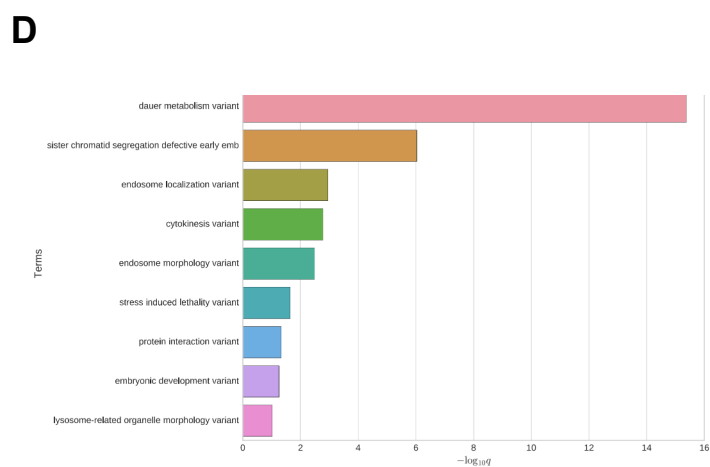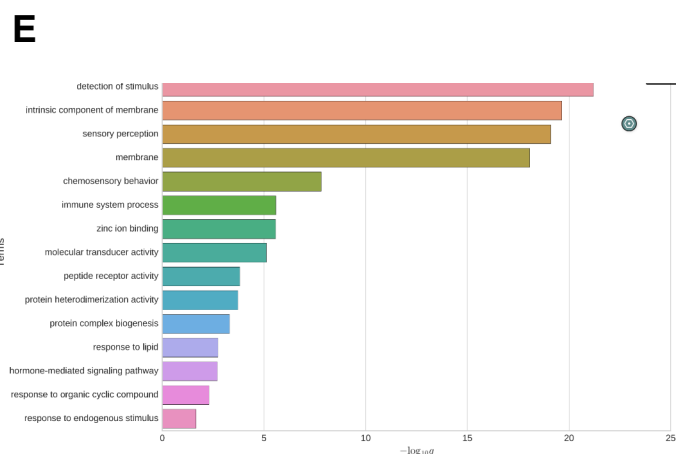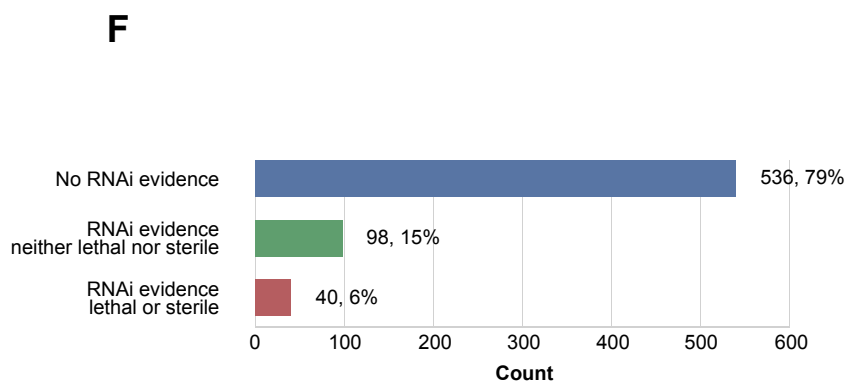

**Supplemental Figure S9.** Quality and gene ontology analysis of N2-specific genes. (A) N2-specific genes (completely deleted genes) compared with two CGH data. CGH1: Maydan et al., 2007, CGH2: Maydan et al., 2010. (B) Analysis of CGH specific genes. 67% of the genes that were reported as deleted by CGH analyses but were not confirmed as N2-specific genes are actually high impact genes in CB4856, and 20% of them were pseudogenes. (C-F) Enrichment analysis of tissue, phenotype and GO in N2-specific genes. (C) Tissue Enrichment Analysis of high-impact SV genes. (D) Phenotype Enrichment Analysis of high-impact SV genes. (E) Gene Ontology Enrichment Analysis of high-impact SV genes. (F) RNAi evidence of lethal and sterile phenotype in N2-specific genes.
