# Supplementary material for: Long-read sequencing reveals intra-species tolerance of substantial structural variations and new subtelomere formation in C. elegans
Source: PubMed Central journal article supplement — Genome Res. 2019 Jun;29(6):1023–35. doi: 10.1101/gr.246082.118 (PMC6581047; doi:10.1101/gr.246082.118), 2019-06
Supplement: supp_gr.246082.118_Supplemental_Fig_S10.pdf [file supp_gr.246082.118_Supplemental_Fig_S10.pdf]

**A**

| Location | N2      | CB4856  | Location | N2      | CB4856  |
|----------|---------|---------|----------|---------|---------|
| Chr IL   | 50,235  | 50,305  | Chr IVL  | 5,937   | 4,396   |
| Chr IR   | 64,274  | 24,112  | Chr IVR  | 16,102  | 16,613  |
| Chr IIL  | 3,823   | 3,803   | Chr VL   | 3,356   | 3,354   |
| Chr IIR  | 23,137  | 13,803  | Chr VR   | 200,000 | 200,000 |
| Chr IIIL | 176,124 | 176,099 | Chr XL   | 29,526  | 36,985  |
| Chr IIIR | 1,406   | 8,309   | Chr XR   | 4,113   | 4,111   |

**B**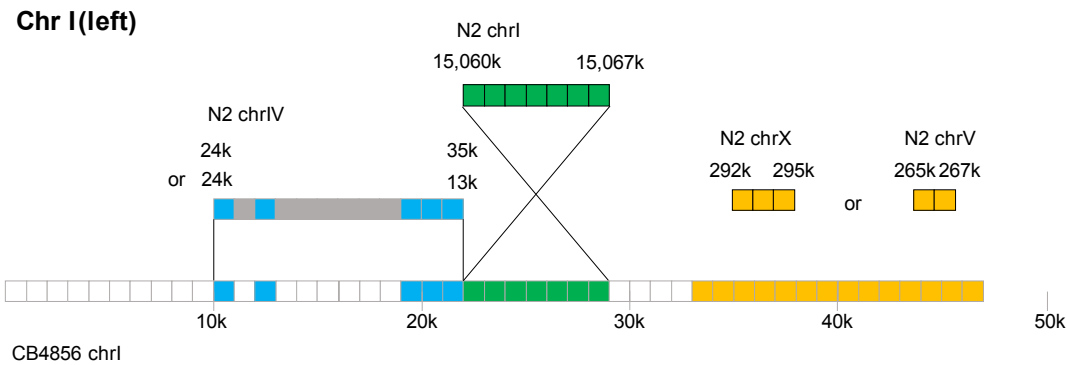**C**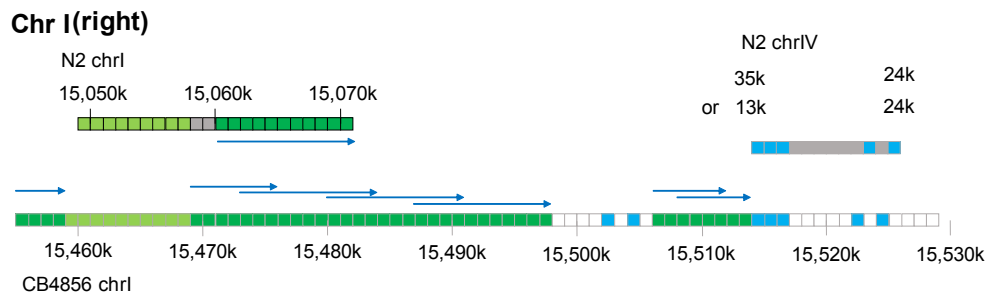**D**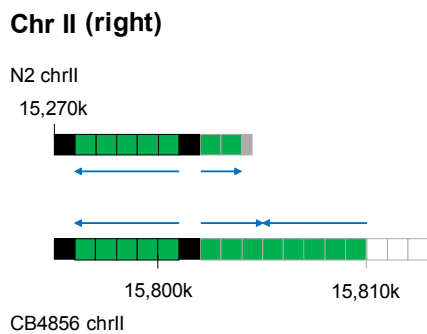**E**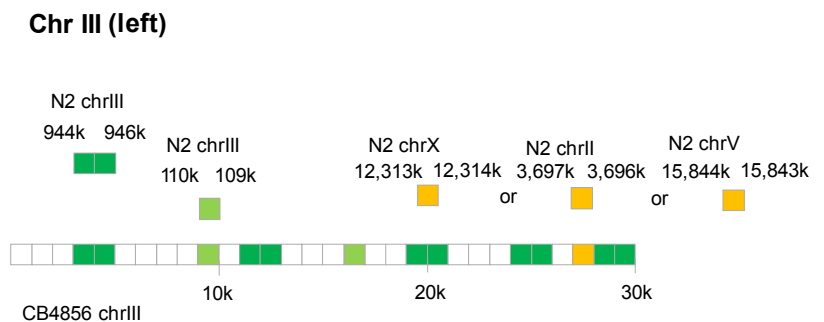**F**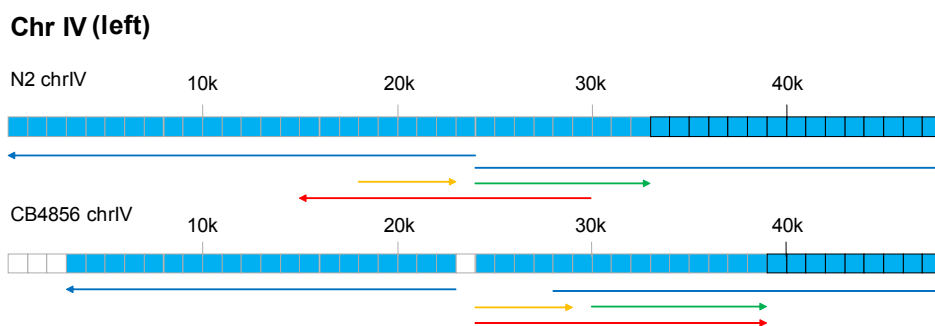**G**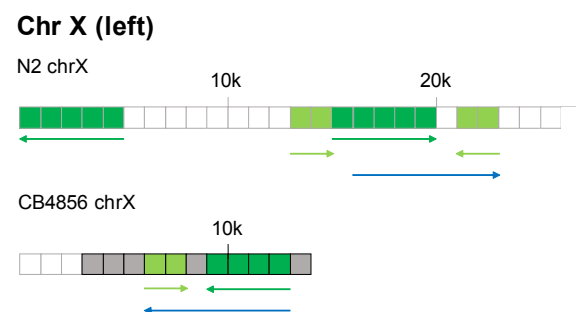

**Supplemental Figure S10. CB4856 subtelomeres.** (A) The number of unaligned bases of each subtelomere (200 kb) between N2 and CB4856 chromosomes obtained using nucmer. (B-G) Schematic representation of BLAST results of unaligned bases in each CB4856 subtelomere of Chr IL (B), Chr IR (C), Chr IIR (D), Chr IIIL (E), Chr IVL (F), and Chr XL (G) to the N2 genome. White blocks represent regions without any homology found using BLAST, and other colored blocks represent aligned regions with homology detected longer than 600 bp. Each block represents 1 kb of genome length and alignments with less than 600 bp in length are not included. Arrows indicate directions.
