# Supplementary material for: Long-read sequencing reveals intra-species tolerance of substantial structural variations and new subtelomere formation in C. elegans
Source: PubMed Central journal article supplement — Genome Res. 2019 Jun;29(6):1023–35. doi: 10.1101/gr.246082.118 (PMC6581047; doi:10.1101/gr.246082.118), 2019-06
Supplement: supp_gr.246082.118_Supplemental_Fig_S11.pdf [file supp_gr.246082.118_Supplemental_Fig_S11.pdf]

**A**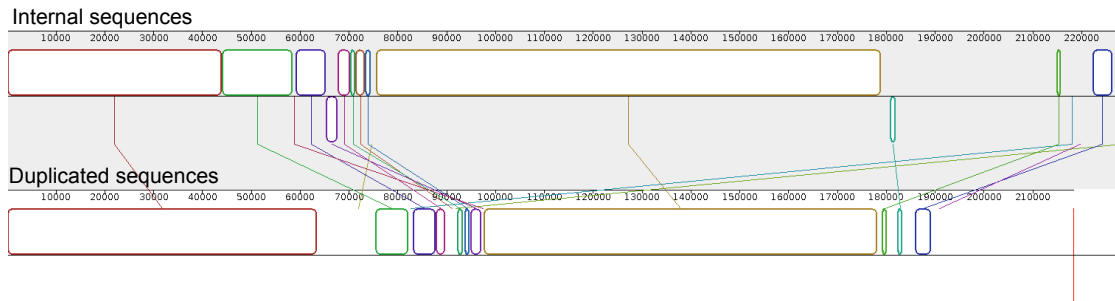**B**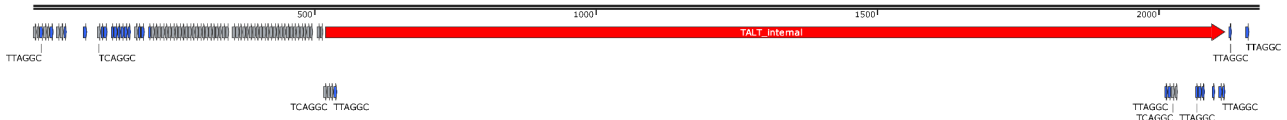**C**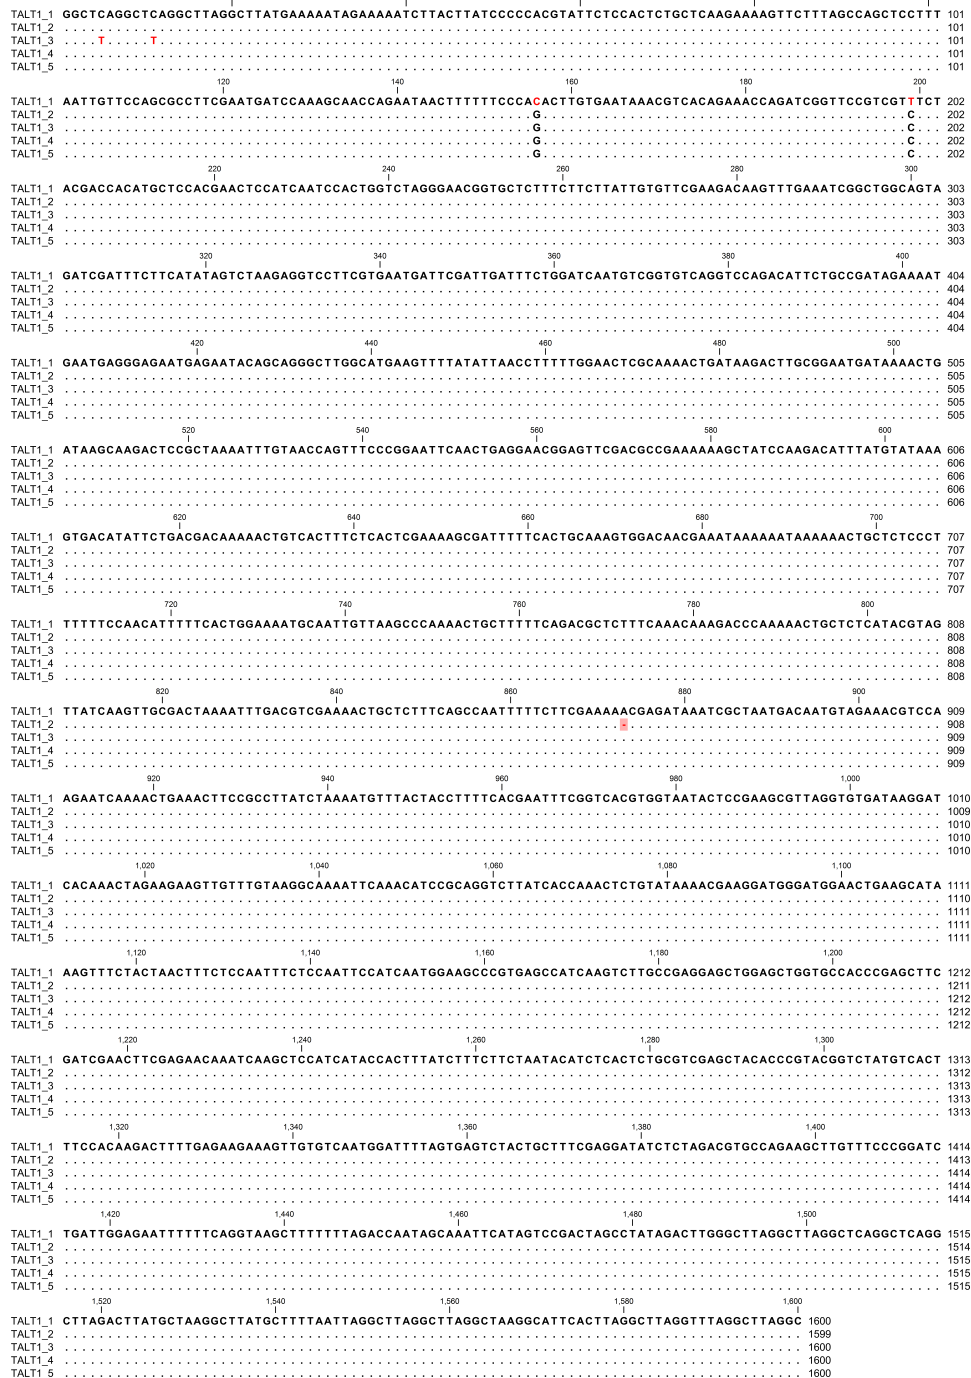

**Supplemental Figure S11.** Alignment between internal and duplicated segments and TALT structures. (A) Schematic alignment between two sequences, obtained using Mauve. (B) Schematic depicting internal TALT structure. Gray arrows: TTAGGC repeats; blue arrows: TCAGGC repeats. Red : TALT sequence. (C) SNPs between tandem-copied TALT sequences.
