# Supplementary material for: Long-read sequencing reveals intra-species tolerance of substantial structural variations and new subtelomere formation in C. elegans
Source: HighWire-hosted journal article supplement (doi:10.1101/gr.246082.118), 2019-05-23
Supplement: Supplemental_Table_S2.xlsx [file Supplemental_Table_S2.xlsx]

## Sheet: Sheet1
Lethal and sterile RNAi phenotype gene list related to Supplemental Figure S9
WormBase Gene ID	Gene Name	Genetic Map Position	RNAi Phenotype	Supporting Evidence	RNAi Phenotype
WBGene00000864	cya-2	II: -14.010230	chromosome segregation variant karyomeres early emb, embryonic lethal	WBPaper00038281(pmid21455289), WBPaper00041771(pmid23195953)	lethal, sterile
WBGene00001927	his-53	V: 1.647300	avoids bacterial lawn, dauer lifespan extended, embryonic lethal, growth variant, larval arrest, locomotion variant, lysosome-related organelle morphology variant, maternal sterile, no induction of antimicrobial peptide expression after infection, organism hypertonic lethality increased, pathogen susceptibility increased, RAB-11 recycling endosome localization variant, RAB-11 recycling endosome m…	WBPaper00038491(pmid21647448)	lethal, sterile
WBGene00004287	rac-2	IV: 14.999460	axon development variant, axon fasciculation variant, axon guidance variant, CAN cell migration variant, cell migration variant, cleavage furrow defective early emb, dauer lifespan extended, distal tip cell migration variant, dumpy, early larval lethal, ectopic axon outgrowth, embryonic lethal, engulfment variant, locomotion variant, lumpy, neuron migration variant, tail withered, vulval cell ind…	WBPaper00005004(pmid11714673)	lethal, sterile
WBGene00007870	C32H11.7	IV: 6.505349	cell death variant, kinker, larval arrest, sterile progeny	WBPaper00038112(pmid21305687)	lethal, sterile
WBGene00008620	F09C6.10	V: 11.346410	embryonic lethal, reduced brood size	WBPaper00024497(pmid15489339)	lethal, sterile
WBGene00009172	F26F2.7	V: 25.015200	embryonic lethal	WBPaper00038491(pmid21647448)	lethal, sterile
WBGene00009485	F36G9.3	V: 9.297033	embryonic lethal, reduced brood size	WBPaper00038491(pmid21647448)	lethal, sterile
WBGene00009525	F38A1.13	IV: -20.554550	embryonic lethal	WBPaper00006395(pmid14551910)	lethal, sterile
WBGene00013060	Y51A2A.4	V: 15.135300	accumulated germline cell corpses, apoptosis reduced, apoptosis variant, chromosome condensation variant, embryo osmotic integrity defective early emb, embryonic lethal, germ cell compartment expansion variant, germ cell compartment size variant, germ cell compartment small, germline nuclear positioning variant, oocyte morphology variant, oocyte number decreased, oogenesis variant, rachis morphol…	WBPaper00025054(pmid15791247), WBPaper00038381(pmid21529718)	lethal, sterile
WBGene00013563	Y75B8A.33	III: 17.028799	avoids bacterial lawn, embryonic lethal, extended life span, larval arrest, slow growth, sterile	WBPaper00006395(pmid14551910), WBPaper00040984(pmid22500807)	lethal, sterile
WBGene00015015	math-1	II: -13.939020	embryonic lethal	WBPaper00006395(pmid14551910)	lethal, sterile
WBGene00015607	fbxb-13	II: -14.415930	embryonic lethal, slow growth, small	WBPaper00004651(pmid11231151)	lethal, sterile
WBGene00016223	C29F9.9	III: -26.985460	pattern of transgene expression variant, receptor mediated endocytosis defective, sterile progeny	WBPaper00006395(pmid14551910)	lethal, sterile
WBGene00017210	F07E5.5	II: -13.914370	locomotion variant, patchy coloration, pattern of transgene expression variant, protruding vulva, receptor mediated endocytosis defective, slow growth, sterile progeny	WBPaper00038491(pmid21647448)	lethal, sterile
WBGene00017344	F10E7.2	II: 0.495464	embryonic lethal	WBPaper00030887(pmid17663785), WBPaper00038491(pmid21647448)	lethal, sterile
WBGene00017363	F10G2.2	V: 0.653356	dauer lifespan extended, embryonic lethal, maternal sterile, sick	WBPaper00005599(pmid12445391), WBPaper00024497(pmid15489339)	lethal, sterile
WBGene00017451	F14D2.2	II: -6.482809	dumpy, embryonic lethal, larval arrest, larval lethal, locomotion variant, slow growth	WBPaper00006395(pmid14551910)	lethal, sterile
WBGene00017452	bath-29	II: -6.529859	embryonic lethal, fat content reduced	WBPaper00006395(pmid14551910)	lethal, sterile
WBGene00017459	F14D2.11	II: -6.656735	embryonic lethal, lethal	WBPaper00024925(pmid15687288), WBPaper00031384(pmid18182484)	lethal, sterile
WBGene00018660	F52C6.3	II: -14.131240	embryonic lethal, larval arrest, larval lethal, lethal, maternal sterile, organism hypertonic lethality increased, protein aggregation variant, sick, sterile, thin, transgene expression reduced, transgene subcellular localization variant	WBPaper00029211(pmid17381296), WBPaper00032236(pmid18829898)	lethal, sterile
WBGene00018661	F52C6.4	II: -14.134870	embryonic lethal, lethal, maternal sterile, organism hypertonic lethality increased, protein aggregation variant, transgene subcellular localization variant	WBPaper00038491(pmid21647448)	lethal, sterile
WBGene00018669	F52C6.12	II: -14.123710	embryonic lethal, fat content reduced, L3 arrest, lethal, lysosome-related organelle morphology variant, pattern of transgene expression variant, RAB-11 recycling endosome localization variant, RAB-11 recycling endosome morphology variant, receptor mediated endocytosis defective, transgene expression reduced, transgene subcellular localization variant	WBPaper00033175(pmid19452197)	lethal, sterile
WBGene00019122	F59E12.6	II: -1.013693	embryonic lethal	WBPaper00005654(pmid12529635)	lethal, sterile
WBGene00019133	F59H6.2	II: -14.011820	chromosome segregation variant karyomeres early emb, embryonic lethal	WBPaper00025054(pmid15791247)	lethal, sterile
WBGene00019139	bath-1	II: -13.992680	embryonic lethal	WBPaper00024925(pmid15687288)	lethal, sterile
WBGene00019589	K09F6.6	II: -13.836200	embryonic lethal, sterile progeny	WBPaper00004651(pmid11231151)	lethal, sterile
WBGene00021656	Y48D7A.1	X: -12.655810	embryonic lethal	WBPaper00004651(pmid11231151)	lethal, sterile
WBGene00022343	Y82E9BR.10	III: -21.940269	cell division variant, egg laying defective, embryonic lethal, locomotion variant, long, slow growth, thin, transgene expression reduced, vulva development variant	WBPaper00006395(pmid14551910), WBPaper00005654(pmid12529635), WBPaper00004403(pmid11099034), WBPaper00025054(pmid15791247)	lethal, sterile
WBGene00022346	pals-17	III: -21.896900	organism hypertonic lethality increased, slow growth	WBPaper00032236(pmid18829898)	lethal, sterile
WBGene00022561	btb-13	II: -14.828020	cortical dynamics defective early emb, embryonic lethal, transgene expression increased	WBPaper00025054(pmid15791247)	lethal, sterile
WBGene00206535	M162.15	V: 23.304880	larval lethal	WBPaper00005225(pmid11896188)	lethal, sterile
Lethal and sterile allele phenotype list related to Supplemental Figure S5
WormBase Gene ID	Gene Name	Genetic Map Position	Allele	Supporting Evidence	Allele Phenotype
WBGene00005375	srh-159	V: 12.818320	tm8371	Classified as lethal or sterile by the National BioResource Project of Japan	lethal, sterile
WBGene00008678	stdh-2	V: 9.852273	tm6852	Classified as lethal or sterile by the National BioResource Project of Japan	lethal, sterile
WBGene00013152	Y53F4B.5	II: 23.879570	tm4858	Classified as lethal or sterile by the National BioResource Project of Japan	lethal, sterile
WBGene00013466	srz-47	V: 12.824150	tm8371	Classified as lethal or sterile by the National BioResource Project of Japan	lethal, sterile
WBGene00021463	zeel-1	I: -9.118427	tm3419	Classified as lethal or sterile by the National BioResource Project of Japan	lethal, sterile
WBGene00050892	ttr-57	V: 25.021299	tm5058	Classified as lethal or sterile by the National BioResource Project of Japan	lethal, sterile
