# Supplementary material for: Long-read sequencing reveals intra-species tolerance of substantial structural variations and new subtelomere formation in C. elegans
Source: HighWire-hosted journal article supplement (doi:10.1101/gr.246082.118), 2019-05-23
Supplement: Supplemental_Table_S3.xlsx [file Supplemental_Table_S3.xlsx]

## Sheet: Sheet1
Estimation of TALT copy number. Strain list related to Fig. 4B
Isotype	Chr	Start	End	Length	TALT coverage	Genome coverage	Normalized coverage
CX11315	V	19229655	19231120	1466	500.9	50.55	9.91
DL226	V	19229655	19231120	1466	664.54	80.7	8.23
CX11262	V	19229655	19231120	1466	269.89	41.57	6.49
CB4856	V	19229655	19231120	1466	1358.93	218.77	6.21
QX1794	V	19229655	19231120	1466	468.78	75.72	6.19
CX11264	V	19229655	19231120	1466	812.55	135.47	6
QX1793	V	19229655	19231120	1466	357.94	61.95	5.78
JU393	V	19229655	19231120	1466	68.4	42.56	1.61
AB1	V	19229655	19231120	1466	162.34	116.65	1.39
JU561	V	19229655	19231120	1466	61.62	44.71	1.38
N2	V	19229655	19231120	1466	200.72	145.59	1.38
JU778	V	19229655	19231120	1466	120.92	88.23	1.37
NIC166	V	19229655	19231120	1466	51.58	38.79	1.33
NIC236	V	19229655	19231120	1466	100.37	75.45	1.33
CX11276	V	19229655	19231120	1466	66.59	50.26	1.32
CX11254	V	19229655	19231120	1466	68.58	52.82	1.3
JU847	V	19229655	19231120	1466	47.05	36.11	1.3
JU367	V	19229655	19231120	1466	108.47	84.66	1.28
NIC195	V	19229655	19231120	1466	214.94	167.31	1.28
CX11307	V	19229655	19231120	1466	91.17	72.41	1.26
JU1568	V	19229655	19231120	1466	84.46	67.27	1.26
CB4858	V	19229655	19231120	1466	70.63	56.52	1.25
ED3049	V	19229655	19231120	1466	184.29	147.81	1.25
EG4349	V	19229655	19231120	1466	67.04	53.45	1.25
JU792	V	19229655	19231120	1466	36.96	29.98	1.23
JU1242	V	19229655	19231120	1466	74.12	60.74	1.22
CB4854	V	19229655	19231120	1466	82.62	68.59	1.2
EG4347	V	19229655	19231120	1466	80.45	67.72	1.19
JU346	V	19229655	19231120	1466	110.67	93.16	1.19
AB4	V	19229655	19231120	1466	267.06	226.76	1.18
CB4857	V	19229655	19231120	1466	113.57	96.58	1.18
JU830	V	19229655	19231120	1466	74.32	63.23	1.18
QG556	V	19229655	19231120	1466	98.03	82.91	1.18
QX1233	V	19229655	19231120	1466	78.59	66.87	1.18
WN2002	V	19229655	19231120	1466	56.94	48.34	1.18
JU1586	V	19229655	19231120	1466	147.14	125.49	1.17
JU360	V	19229655	19231120	1466	192.04	164.8	1.17
DL238	V	19229655	19231120	1466	149.8	128.77	1.16
JU397	V	19229655	19231120	1466	71.34	62.2	1.15
CB4852	V	19229655	19231120	1466	337.76	297.43	1.14
DL200	V	19229655	19231120	1466	43	37.7	1.14
ED3005	V	19229655	19231120	1466	107.41	94.1	1.14
JU1395	V	19229655	19231120	1466	24.16	21.11	1.14
JU2001	V	19229655	19231120	1466	60.5	52.91	1.14
NIC199	V	19229655	19231120	1466	97.88	85.79	1.14
NIC207	V	19229655	19231120	1466	51.8	45.26	1.14
ED3017	V	19229655	19231120	1466	146.64	129.75	1.13
JU1581	V	19229655	19231120	1466	183.7	162.6	1.13
JU406	V	19229655	19231120	1466	35.08	31.07	1.13
NIC1	V	19229655	19231120	1466	76.99	68.39	1.13
QG536	V	19229655	19231120	1466	262.09	232.49	1.13
QG557	V	19229655	19231120	1466	56.27	49.89	1.13
EG4724	V	19229655	19231120	1466	108.64	96.67	1.12
JU1652	V	19229655	19231120	1466	69.22	61.72	1.12
JU2519	V	19229655	19231120	1466	27	24.1	1.12
CB4855	V	19229655	19231120	1466	72.06	65.19	1.11
ED3012	V	19229655	19231120	1466	66.35	59.83	1.11
ED3077	V	19229655	19231120	1466	113.86	102.13	1.11
QX1792	V	19229655	19231120	1466	122.34	110.07	1.11
CB4851	V	19229655	19231120	1466	135.27	122.47	1.1
JU1200	V	19229655	19231120	1466	165.09	150.44	1.1
JU258	V	19229655	19231120	1466	140.46	127.2	1.1
JU323	V	19229655	19231120	1466	96	87.35	1.1
JU642	V	19229655	19231120	1466	113.83	103.64	1.1
MY16	V	19229655	19231120	1466	168.93	153.23	1.1
NIC231	V	19229655	19231120	1466	131.23	118.84	1.1
QX1211	V	19229655	19231120	1466	329.23	299.53	1.1
JU1172	V	19229655	19231120	1466	49.9	45.65	1.09
JU1213	V	19229655	19231120	1466	67.73	61.91	1.09
JU1400	V	19229655	19231120	1466	124.88	114.51	1.09
JU775	V	19229655	19231120	1466	99.76	91.37	1.09
JU782	V	19229655	19231120	1466	160.11	147.36	1.09
QX1791	V	19229655	19231120	1466	94.83	86.72	1.09
ED3040	V	19229655	19231120	1466	174.72	162.41	1.08
ED3048	V	19229655	19231120	1466	89.86	83.21	1.08
MY10	V	19229655	19231120	1466	77.31	71.73	1.08
CB4853	V	19229655	19231120	1466	191.46	179.17	1.07
JU1246	V	19229655	19231120	1466	59.67	55.76	1.07
JU2513	V	19229655	19231120	1466	41.3	38.66	1.07
JU2522	V	19229655	19231120	1466	41.34	38.82	1.07
JU311	V	19229655	19231120	1466	189.03	176.17	1.07
KR314	V	19229655	19231120	1466	95.1	89.11	1.07
PS2025	V	19229655	19231120	1466	63.76	59.64	1.07
CB4932	V	19229655	19231120	1466	124.23	116.82	1.06
ED3052	V	19229655	19231120	1466	88.52	83.51	1.06
JT11398	V	19229655	19231120	1466	67.73	63.89	1.06
JU394	V	19229655	19231120	1466	104.05	97.81	1.06
JU751	V	19229655	19231120	1466	66.21	62.57	1.06
LSJ1	V	19229655	19231120	1466	118	111.27	1.06
MY23	V	19229655	19231120	1466	167	157.74	1.06
NIC3	V	19229655	19231120	1466	127.22	119.5	1.06
PB303	V	19229655	19231120	1466	69.33	65.23	1.06
ED3046	V	19229655	19231120	1466	127.48	120.96	1.05
JU1409	V	19229655	19231120	1466	119.68	113.46	1.05
JU2526	V	19229655	19231120	1466	34.29	32.57	1.05
NIC2	V	19229655	19231120	1466	73.67	70.39	1.05
WN2001	V	19229655	19231120	1466	567.46	541.45	1.05
JU1580	V	19229655	19231120	1466	157.35	151.06	1.04
JU774	V	19229655	19231120	1466	85.82	82.15	1.04
PX179	V	19229655	19231120	1466	91.8	87.99	1.04
JU1088	V	19229655	19231120	1466	98.85	96.43	1.03
MY18	V	19229655	19231120	1466	144.24	139.76	1.03
QG2075	V	19229655	19231120	1466	31.35	30.4	1.03
QX1212	V	19229655	19231120	1466	251.12	244.49	1.03
JU1440	V	19229655	19231120	1466	55.5	54.53	1.02
EG4946	V	19229655	19231120	1466	112.83	111.22	1.01
JU1212	V	19229655	19231120	1466	42.34	41.81	1.01
JU1491	V	19229655	19231120	1466	116.62	115.17	1.01
JU2007	V	19229655	19231120	1466	102.29	101.24	1.01
CX11314	V	19229655	19231120	1466	60.12	60.31	1
JU1530	V	19229655	19231120	1466	101.08	102.15	0.99
CX11292	V	19229655	19231120	1466	96.37	98.29	0.98
LKC34	V	19229655	19231120	1466	94.83	96.63	0.98
MY1	V	19229655	19231120	1466	183.44	186.61	0.98
QW947	V	19229655	19231120	1466	33.67	34.27	0.98
EG4725	V	19229655	19231120	1466	46.06	47.72	0.97
GXW1	V	19229655	19231120	1466	95.08	98.4	0.97
JU2316	V	19229655	19231120	1466	22.89	23.72	0.97
ED3073	V	19229655	19231120	1466	140.39	146.31	0.96
JU310	V	19229655	19231120	1466	140.88	146.64	0.96
RC301	V	19229655	19231120	1466	135.2	141.73	0.95
CX11271	V	19229655	19231120	1466	62.04	66.32	0.94
ED3011	V	19229655	19231120	1466	47.5	50.52	0.94
JU440	V	19229655	19231120	1466	63.72	68.12	0.94
JU2466	V	19229655	19231120	1466	25.97	27.9	0.93
JU312	V	19229655	19231120	1466	25.69	27.53	0.93
JU2464	V	19229655	19231120	1466	96.75	108.26	0.89
PB306	V	19229655	19231120	1466	66.01	74.9	0.88
JU1896	V	19229655	19231120	1466	63.32	72.55	0.87
NIC259	V	19229655	19231120	1466	23.36	27.14	0.86
CX11285	V	19229655	19231120	1466	140.8	166.27	0.85
NIC255	V	19229655	19231120	1466	26.78	31.61	0.85
NIC266	V	19229655	19231120	1466	28.03	33.5	0.84
NIC268	V	19229655	19231120	1466	32.22	38.23	0.84
NIC242	V	19229655	19231120	1466	28.79	34.87	0.83
NIC251	V	19229655	19231120	1466	30.44	36.47	0.83
NIC267	V	19229655	19231120	1466	63.04	77.2	0.82
NIC272	V	19229655	19231120	1466	78.81	95.91	0.82
BRC20067	V	19229655	19231120	1466	26.75	33.77	0.79
NIC252	V	19229655	19231120	1466	21.93	27.75	0.79
NIC256	V	19229655	19231120	1466	41.44	52.31	0.79
NIC271	V	19229655	19231120	1466	26.33	33.48	0.79
NIC261	V	19229655	19231120	1466	31.33	41.4	0.76
NIC269	V	19229655	19231120	1466	33.11	45.1	0.73
NIC277	V	19229655	19231120	1466	25.07	35.37	0.71
ECA36	V	19229655	19231120	1466	20.99	30.85	0.68
NIC262	V	19229655	19231120	1466	21.4	31.49	0.68
NIC275	V	19229655	19231120	1466	18.68	27.86	0.67
NIC265	V	19229655	19231120	1466	17.94	27.67	0.65
NIC260	V	19229655	19231120	1466	23.03	38.67	0.6
NIC276	V	19229655	19231120	1466	15.95	26.43	0.6
NIC258	V	19229655	19231120	1466	20.65	36.24	0.57
